# Supplementary material for: Spicy food for the egg-cowries: the evolution of corallivory in the Ovulidae (Gastropoda: Cypraeoidea)
Source: Frontiers journal article supplement (doi:10.3389/fmars.2023.1323156), 2024-01-22
Supplement: Table_1.XLSX [file Table_1.XLSX]

## Sheet: Foglio1
Species	Voucher	Locality	N° locality	References	Host family	Host genus	COI	16S	28S
Pedicularia vanderlandi	1IND01P1	Indonesia, Siladen Is.; 1°37'34.81"N, 124°48'10.97"E, 40 m	1	This paper	Stylasteridae	Stylaster	OR616007	OR625724
Pedicularia vanderlandi	1IND01P2	Indonesia, Siladen Is.; 1°37'34.81"N, 124°48'10.97"E, 40 m	1	This paper	Stylasteridae	Stylaster	OR616008	OR625725	OR625947
Pedicularia vanderlandi	1IND01P3	Indonesia, Siladen Is.; 1°37'34.81"N, 124°48'10.97"E, 40 m	1	This paper	Stylasteridae	Stylaster	OR616009	OR625726	OR625948
Pedicularia vanderlandi	2IND01P1	Indonesia, Bunaken Is.; 1°36'21.12"N, 124°46'4.49"E, 15 m	1	This paper	Stylasteridae	Stylaster	OR616010	OR625727	OR625949
Pedicularia vanderlandi	2IND01P2	Indonesia, Bunaken Is.; 1°36'21.12"N, 124°46'4.49"E, 15 m	1	This paper	Stylasteridae	Stylaster	OR616011	OR625728	OR625950
Pedicularia vanderlandi	2IND01P3	Indonesia, Bunaken Is.; 1°36'21.12"N, 124°46'4.49"E, 15 m	1	This paper	Stylasteridae	Stylaster	OR616012	OR625729	OR625951
Pedicularia vanderlandi	3IND01P1	Indonesia, Bangka Is.; 1°44'8.63"N, 125° 8'53.04"E, 15 m	1	This paper	Stylasteridae	Stylaster	OR616013	OR625730
Pedicularia vanderlandi	3IND01P3	Indonesia, Bangka Is.; 1°44'8.63"N, 125° 8'53.04"E, 15 m	1	This paper	Stylasteridae	Stylaster		OR625731
Pedicularia vanderlandi	3IND02P1	Indonesia, Bangka Is.; 1°45'3.30"N, 125° 7'59.72"E, 2,2 m	1	This paper	Stylasteridae	Stylaster	OR616014		OR625953
Pedicularia vanderlandi	3IND02P2	Indonesia, Bangka Is.; 1°45'3.30"N, 125° 7'59.72"E, 2,2 m	1	This paper	Stylasteridae	Stylaster	OR616015	OR625732	OR625954
Pedicularia vanderlandi	3IND02P3	Indonesia, Bangka Is.; 1°45'3.30"N, 125° 7'59.72"E, 2,2 m	1	This paper	Stylasteridae	Stylaster		OR625733
Pedicularia vanderlandi	3IND05P1	Indonesia, Bangka Is.; 1°44'36.02"N, 125° 9'39.46"E, 20 m	1	This paper	Stylasteridae	Distichopora	OR616016	OR625734	OR625955
Pedicularia vanderlandi	3IND05P2	Indonesia, Bangka Is.; 1°44'36.02"N, 125° 9'39.46"E, 20 m	1	This paper	Stylasteridae	Distichopora	OR616017	OR625735	OR625956
Pedicularia vanderlandi	3IND05P3	Indonesia, Bangka Is.; 1°44'36.02"N, 125° 9'39.46"E, 20 m	1	This paper	Stylasteridae	Distichopora	OR616018	OR625736
Pedicularia vanderlandi	3IND06P1	Indonesia, Bangka Is.; 1°46'7.42"N, 125°10'31.08"E, 1,5 m	1	This paper	Stylasteridae	Distichopora	OR616019	OR625737	OR625957
Pedicularia vanderlandi	3IND06P2	Indonesia, Bangka Is.; 1°46'7.42"N, 125°10'31.08"E, 1,5 m	1	This paper	Stylasteridae	Distichopora	OR616020	OR625738
Pedicularia vanderlandi	3IND06P3	Indonesia, Bangka Is.; 1°46'7.42"N, 125°10'31.08"E, 1,5 m	1	This paper	Stylasteridae	Distichopora	OR616021	OR625739	OR625958
Pedicularia pacifica	MNHN-IM-2019-24928	Marquesas	19	This paper	Stylasteridae	Distichopora	OR616022	OR625740	OR625959
Pedicularia pacifica	MNHN-IM-2019-24929	Vanuatu	3	This paper	Stylasteridae	Distichopora	OR616023	OR625741
Pedicularia pacifica	MNHN-IM-2019-24930	Vanuatu	3	This paper	Stylasteridae	Distichopora		OR625742
Pedicularia pacifica	MNHN-IM-2019-24931	Vanuatu	3	This paper	Stylasteridae	Distichopora	OR616024	OR625743
Pedicularia vanderlandi	AM C.547150	Australia, Day Reef, north point, outer slope; ,14°28'10.62"S, 145°31'51.36"W, 0 m	2	This paper	Stylasteridae	Stylaster	OR616037	OR625756
Pedicularia vanderlandi	AM C.547151	Australia, Day Reef, north point, outer slope; ,14°28'10.62"S, 145°31'51.36"W, 0 m	2	This paper	Stylasteridae	Stylaster	OR616038	OR625757
Pedicularia vanderlandi	AM C.547152	Australia, MacGilivray Reef; ,14°38'49.33"S, 145°29'13.55"W, 0 m	2	This paper	Stylasteridae	Distichopora	OR616039	OR625758	OR625960
Pedicularia vanderlandi	AM C.547153	Australia, Day Reef, north point, outer slope; ,14°28'10.62"S, 145°31'51.36"W, 0 m	2	This paper	Stylasteridae	Distichopora	OR616040	OR625759
Pedicularia vanderlandi	AM C.547154	Australia, Yonge Reef, south end, front reef; ,14°34'15.70"S, 145°36'58.02"W, 0 m	2	This paper	Stylasteridae	Distichopora	OR616041	OR625760	OR625961
Pedicularia vanderlandi	AM C.547156	Australia, North Direction Island, north face; ,14°44'34.68"S, 145°30'50.40"W, 0 m	2	This paper	Stylasteridae	Stylaster	OR616042	OR625761	OR625962
Pedicularia vanderlandi	AM C.547158	Australia, Yonge Reef, north end, LanceÆs Wall of Fish; ,14°34'15.70"S, 145°36'58.02"W, 0 m	2	This paper	Stylasteridae	Distichopora	OR616043	OR625762
Pseudosimnia adriatica	BAU-4169.1	Italy, Cosenza, EDITS 2018; GSA 10/43, 15° 55' 4.8''N , 39° 3' 5.399'' E, 617 m	4	This paper			OR616025	OR625744
Pseudosimnia adriatica	BAU-4169.2	Italy, Cosenza, EDITS 2018; GSA 10/43, 15° 55' 4.8''N , 39° 3' 5.399'' E, 617 m	4	This paper			OR616026	OR625745
Jenneria pustulata	BAU-4297	Mexico, Playa Tenacatita Jalisco	5	This paper			OR616027	OR625746	OR625965
Jenneria pustulata*	BAU-4298	Mexico, Playa Tenacatita Jalisco	5	This paper			OR616028	OR625747	OR625966
Jenneria pustulata	BAU-4299	Mexico, Playa Tenacatita Jalisco	5	This paper			OR616029	OR625748	OR625967
Pseudosimnia carnea	BAU-4518	Italy, Alghero	7	This paper			OR616030	OR625749
Phenacovolva rosea	BAU-4542	Japan, Sagami Bay; 35.129N , 139.6338E, 14-19 m	35	This paper	Astrogorgiidae°		OR616031	OR625750	OR625968
Pedicularia pacifica	BAU-4543	Maldives, Route 66 andM, MandM-09, 3°4'29.2"N, 72°57'58.6"E, 4-45 m	36	This paper	Stylasteridae°	Distichopora	OR616032	OR625751	OR625969
Pedicularia pacifica*	BAU-4547	Maldives, Magoodhou Is andM, MandM-14, , 4-46 m	36	This paper	Stylasteridae°	Distichopora	OR616033	OR625752	OR625970
Prosimnia semperi	BAU-4548	Maldives, Magoodhou Is andM, MandM-14, , 4-46 m	36	This paper	Astrogorgiidae°		OR616034	OR625753	OR625971
Archivolva clava*	BAU-4555	Maldives,MandM, MandM-22, , 3-31 m	36	This paper	Siphonogorgiidae		OR616035	OR625754	OR625972
Prosimnia semperi	BAU-4556	Maldives,MandM, MandM-22, , 3-31 m	36	This paper			OR616036	OR625755	OR625973
Calpurnus verrucosus	MNHN-IM-2007-32154	Philippines, Panglao I.; PANGLAO 2004, M7, 09°36,1'N, 123°45,2'E, 0-3 m	8	This paper			OR616044	OR625763	OR625974
Ovula ovum	MNHN-IM-2007-32155	Philippines, Panglao I.; PANGLAO 2004, R9, 09°33,2'N, 123°48,3'E, 5-22 m	11	This paper			OR616045	OR625764	OR625975
Volva kilburni	MNHN-IM-2007-33689	Philippines; AURORA 2007, CP2665, 15°54'N, 121°42'E, 123-125 m	15	This paper			OR616046	OR625765
Volva volva	MNHN-IM-2007-33690	Philippines; AURORA 2007, CP2654, 16°04'N, 121°57'E, 98-107 m	15	This paper			OR616047	OR625766
Volva volva*	MNHN-IM-2007-33691	Philippines; AURORA 2007, CP2653, 16°05,8'N, 121°58,8'E, 83 m	15	This paper			OR616048	OR625767	OR625976
Calcarovula longirostrata	MNHN-IM-2007-33692	NORD New Caledonia, Grand Passage; CONCALIS, DW2963, 18°22'S, 162°59'E, 220-240 m	9	This paper			OR616049	OR625768	OR625977
Takasagovolva honkakujiana	MNHN-IM-2007-33696	New Caledonia, Banc Crypthelia; NORFOLK 2, DW2123, 23°18'S, 168°15'E, 187-197 m	13	This paper			OR616050	OR625769
Quasisimnia robertsoni*	MNHN-IM-2007-33697	New Caledonia, Banc Jumeau est; NORFOLK 2, CP2111, 23°49'S, 168°17'E, 500-1074 m	13	This paper			OR616051	OR625770	OR625978
Quasisimnia robertsoni	MNHN-IM-2007-33698	New Caledonia, Banc Jumeau est; NORFOLK 2, CP2111, 23°49'S, 168°17'E, 500-1074 m	10	This paper			OR616052
Lunovula superstes*	MNHN-IM-2007-33699	NORD New Caledonia, Grand Passage; CONCALIS, DW2996, 18°01'S, 163°01'E, 487-500 m	9	This paper			OR616053	OR625771	OR625979
Pedicularia elegantissima	MNHN-IM-2007-34027	New Caledonia, Plateau des Chesterfield; EBISCO, DW2584, 19°38'S, 158°44'E, 569-570 m	16	This paper			OR616054	OR625772
Contrasimnia formosana*	MNHN-IM-2007-35909	Salomon Is., Guadalcanal; SALOMONBOA 3, CP2767, 09°19'S, 160°06'E, 416-425 m	11	This paper			OR616055	OR625773	OR625980
Contrasimnia formosana	MNHN-IM-2007-35910	Salomon Is., Guadalcanal; SALOMONBOA 3, CP2767, 09°19'S, 160°06'E, 416-425 m	11	This paper			OR616056		OR625981
Contrasimnia formosana	MNHN-IM-2007-35916	Salomon Is., Guadalcanal; SALOMONBOA 3, CP2767, 09°19'S, 160°06'E, 416-425 m	11	This paper			OR616057	OR625774
Contrasimnia formosana	MNHN-IM-2007-35928	Salomon Is., Guadalcanal; SALOMONBOA 3, CP2767, 09°19'S, 160°06'E, 416-425 m	11	This paper			OR616058	OR625775
Contrasimnia formosana	MNHN-IM-2007-35929	Salomon Is., Guadalcanal; SALOMONBOA 3, CP2767, 09°19'S, 160°06'E, 416-425 m	11	This paper			OR616059	OR625776
Contrasimnia formosana	MNHN-IM-2007-36342	Salomon Is., Guadalcanal; SALOMONBOA 3, CP2848, 09°35'S, 160°47'E, 414-456 m	11	This paper			OR616060
Contrasimnia formosana	MNHN-IM-2007-36343	Salomon Is., Guadalcanal; SALOMONBOA 3, CP2848, 09°35'S, 160°47'E, 414-456 m	11	This paper			OR616061	OR625777	OR625982
Contrasimnia formosana	MNHN-IM-2007-36344	Salomon Is., Guadalcanal; SALOMONBOA 3, CP2848, 09°35'S, 160°47'E, 414-456 m	11	This paper			OR616062	OR625778
Contrasimnia formosana	MNHN-IM-2007-36345	Salomon Is., Guadalcanal; SALOMONBOA 3, CP2848, 09°35'S, 160°47'E, 414-456 m	11	This paper			OR616063	OR625779
Takasagovolva honkakujiana*	MNHN-IM-2007-36346	Salomon Is., Marau Sound; SALOMONBOA 3, DW2855, 09°45'S, 160°50'E, 167-183 m	8	This paper			OR616064	OR625780	OR625983
Volva kilburni	MNHN-IM-2007-38101	Madagascar, entre Majunga et Cap Saint-André IRIKY, CP3260, 15°35'S, 45°45'E, 179-193 m	12	This paper			OR616065	OR625781
Quasisimnia hirasei*	MNHN-IM-2007-38930	Mozambik Canal, Inhambane transect AINBAZA, CP3144, 23°33'S, 35°41'E, 171-180 m	13	This paper			OR616066	OR625782
Aclyvolva coarctata	MNHN-IM-2013-11744	Papua New Guinea, W Kranket I.; Papua Niugini, PR17, 05°11,8'S, 145°48,8'E, 15 m	18	This paper			OR616067	OR625783
Aclyvolva coarcata	MNHN-IM-2013-11745	Papua New Guinea, W Kranket I.; Papua Niugini, PR17, 05°11,8'S, 145°48,8'E, 15 m	18	This paper	Ellisellidae°		OR616068		OR625984
Phenacovolva rosea	MNHN-IM-2013-11746	Papua New Guinea, W Kranket I.; Papua Niugini, PR17, 05°11,8'S, 145°48,8'E, 15 m	18	This paper	Astrogorgiidae°		OR616069	OR625784
Phenacovolva rosea	MNHN-IM-2013-11747	Papua New Guinea, W Kranket I.; Papua Niugini, PR17, 05°11,8'S, 145°48,8'E, 15 m	18	This paper			OR616070		OR625985
Calpurnus verrucosus	MNHN-IM-2013-13421	Papua New Guinea, Tab I.; Papua Niugini, PR42, 05°10,2'S, 145°50,3'E	18	This paper			OR616071	OR625785
Naviculavolva kurziana	MNHN-IM-2013-13966	Papua New Guinea, NW Tab I.; Papua Niugini, PR55, 05°09,6'S, 145°49,4'E, 20 m	18	This paper	Alcyoniidae°		OR616072	OR625786	OR625986
Diminovula culmen*	MNHN-IM-2013-15219	Papua New Guinea; Papua Niugini, PR100		This paper	Nephtheidae°	Dendronepthia	OR616073
Phenacovolva lahainaensis	MNHN-IM-2013-1738	Papua New Guinea, BilBil I.; Papua Niugini, PR15, 05°17,9'S, 145°46,7'E, 21 m	18	This paper				OR625787	OR625987
Habuprionovolva sp.*	MNHN-IM-2013-17977	Papua New Guinea, S Urembo I.; Papua Niugini, PS42, 5° 15' 54.72'' S, 145° 47' 8.7036'' E, 18-27 m	23	This paper	Nephtheidae°	Dendronepthia	OR616074	OR625788
Phenacovolva nectarea	MNHN-IM-2013-18075	Papua New Guinea, W Yabob I.; Papua Niugini, PR212, 05°15,4'S, 145°46,9'E	18	This paper	Ellisellidae°	Ellisella	OR616075	OR625789
Phenacovolva nectarea	MNHN-IM-2013-18076	Papua New Guinea, W Yabob I.; Papua Niugini, PR212, 05°15,4'S, 145°46,9'E	18	This paper				OR625790	OR625988
Hiatavolva depressa*	MNHN-IM-2013-18146	Papua New Guinea, W Tab I.; Papua Niugini, PR242, 05°10,2'S, 145°50,4'E, 4-24 m	18	This paper			OR616076	OR625791	OR625989
Cyphoma gibbosum	MNHN-IM-2013-20026	Guadeloupe, Anse Babin (Morne-à-l’eau); KARUBENTHOS 2012, GM02, 16°20,45'N, 61°31,55'W, 1 m	15	This paper				OR625792
Cyphoma signatum	MNHN-IM-2013-20088	Guadeloupe, Anse Babin (Morne-à-l’eau); KARUBENTHOS 2012, GM02, 16°20,45'N, 61°31,55'W, 1 m	15	This paper				OR625793
Pedicularia vanderlandi	MNHN-IM-2013-3196	Papua New Guinea, Planet Rock; Papua Niugini, PR43, 05°15,5'S, 145°49,1'E	18	This paper	Stylasteridae	Disticopora	OR616077	OR625794	OR625990
Pseudocypraea adamsonii*	MNHN-IM-2013-3598	Papua New Guinea, Bilbil I.; Papua Niugini, PB29, 5° 18' 0.18'' S, 145° 46' 7.0716'' E, 17 m	23	This paper			OR616078	OR625795	OR625991
Margovula anulata	MNHN-IM-2013-3686	Papua New Guinea, S Kranket I.; Papua Niugini, PR64, 05°12,3'S, 145°48,8'E	18	This paper			OR616079	OR625796
Prosimnia semperi	MNHN-IM-2013-4178	Papua New Guinea, Tab I.; Papua Niugini, PR73, 05°10,2'S, 145°50,3'E	18	This paper	Melithaeidae°	Melithaea	OR616080	OR625797
Procalpurnus semistriatus*	MNHN-IM-2013-4426	Papua New Guinea, Rempi Area; Papua Niugini, PR81, 05°01,6'S, 145°47,9'E, 2-15 m	18	This paper	Sinulariidae°	Sinularia	OR616081	OR625798
Prosimnia semperi	MNHN-IM-2013-4430	Papua New Guinea, Kranket I.; Papua Niugini, PR86, 05°12'S, 145°48,8'E	18	This paper	Melithaeidae°	Melithaea	OR616082
Prosimnia semperi	MNHN-IM-2013-4431	Papua New Guinea, Kranket I.; Papua Niugini, PR86, 05°12'S, 145°48,8'E	18	This paper			OR616083		OR625992
Quasisimnia robertsoni	MNHN-IM-2013-44511	China Sea, Continental slop; NanHai 2014, CP4117, 20°02'N, 114°09'E, 333-421 m	28	This paper			OR616084	OR625799
Dentiovula dorsuosa*	MNHN-IM-2013-4461	Papua New Guinea, Kranket I.; Papua Niugini, PR90, 05°12'S, 145°49,5'E	18	This paper	Siphonogorgiidae°	Siphonogorgia	OR616085	OR625800	OR625993
Pedicularia pacifica	MNHN-IM-2013-4463	Papua New Guinea, Kranket I.; Papua Niugini, PR90, 05°12'S, 145°49,5'E	18	This paper	Stylasteridae	Disticopora	OR616086	OR625801
Lunovula superstes	MNHN-IM-2013-45640	Madang, Budibudi I. Madeep, DW4292, 09°14'S, 153°52'E, 530 m	11	This paper			OR616087
Lunovula superstes	MNHN-IM-2013-45649	Madang, Budibudi I. Madeep, DW4292, 09°14'S, 153°52'E, 530 m	11	This paper			OR616088	OR625802
Aclyvolva coarctata	MNHN-IM-2013-47410	Papua New Guinea, Kavieng Lagoon; KAVIENG 2014, KR16, 02°36,1'S, 150°45,9'E, 4-26 m	17	This paper	Ellisellidae°	Ellisella	OR616089	OR625803
Phenacovolva nectarea	MNHN-IM-2013-47922	Papua New Guinea, Kavieng Lagoon; KAVIENG 2014, KR18, 02°35,1'S, 150°47,3'E, 10 m	2	This paper			OR616090	OR625804
Phenacovolva nectarea	MNHN-IM-2013-47923	Papua New Guinea, Kavieng Lagoon; KAVIENG 2014, KR18, 02°35,1'S, 150°47,3'E, 10 m	2	This paper				OR625805
Diminovula culmen	MNHN-IM-2013-47924	Papua New Guinea, Kavieng Lagoon; KAVIENG 2014, KR18, 02°35,1'S, 150°47,3'E, 10 m	2	This paper				OR625806
Pedicularia pacifica	MNHN-IM-2013-4804	Papua New Guinea, E Kranket I.; Papua Niugini, PB28, 05°11,9'S, 145°49,6'E, 10 m	18	This paper			OR616091	OR625807
Crenavolva traillii	MNHN-IM-2013-4854	Papua New Guinea, N Siar I.; Papua Niugini, PR12, 05°11'S, 145°48,4'E	18	This paper				OR625808	OR625994
Crenavolva striatula	MNHN-IM-2013-4883	Papua New Guinea, Madang; Papua Niugini, PR126, 05°12,7'S, 145°48,9'E	18	This paper			OR616092	OR625809
Pedicularia elegantissima	MNHN-IM-2013-49141	New Caledonia; Kanadeep		This paper			OR616093	OR625810
Pedicularia elegantissima	MNHN-IM-2013-49142	New Caledonia; Kanadeep		This paper			OR616094	OR625811
Pedicularia elegantissima	MNHN-IM-2013-49144	New Caledonia; Kanadeep		This paper			OR616095	OR625812
Pedicularia elegantissima	MNHN-IM-2013-49150	New Caledonia, S Mont Crypthelia; KANACONO, DW4764, 23°20'S, 168°15'E, 350-356 m	13	This paper			OR616096	OR625813
Pedicularia elegantissima	MNHN-IM-2013-49151	New Caledonia, SE Ile des Pins; KANACONO, DW4741, 22°52'S, 167°41'E, 210 m	26	This paper			OR616097	OR625814
Pedicularia pacifica	MNHN-IM-2013-49298	Marquesas Islands, Ua Huka; PAKAIHI I TE MOANA, MQ11-II-16, 08°51,8'S, 139°35,6'W, 45 m	11	This paper				OR625815
Pedicularia pacifica	MNHN-IM-2013-49445	Marquesas Islands, Ua Huka; PAKAIHI I TE MOANA, MQ11-II-16, 08°51,8'S, 139°35,6'W, 45 m	11	This paper	Stylasteridae	Disticopora	OR616098	OR625816	OR625995
Pedicularia pacifica	MNHN-IM-2013-49448	Marquesas Islands, HivaOa; PAKAIHI I TE MOANA, MQ11-II-38, 09°50,2'S, 139°07,1'W, 30 m	8	This paper			OR616099	OR625817
Pedicularia pacifica	MNHN-IM-2013-49449	Marquesas Islands, HivaOa; PAKAIHI I TE MOANA, MQ11-II-38, 09°50,2'S, 139°07,1'W, 30 m	8	This paper			OR616100	OR625818	OR625996
Pedicularia pacifica	MNHN-IM-2013-49463	Marquesas Islands, Ua Huka; PAKAIHI I TE MOANA, MQ11-II-16, 08°51,8'S, 139°35,6'W, 45 m	11	This paper	Stylasteridae	Disticopora	OR616101	OR625819
Pedicularia pacifica	MNHN-IM-2013-49464	Marquesas Islands, HivaOa; PAKAIHI I TE MOANA, MQ11-II-23, 09°44,4'S, 138°48,5'W, 30 m	8	This paper	Stylasteridae°	Disticopora		OR625820
Phenacovolva nectarea	MNHN-IM-2013-50642	Papua New Guinea, Kavieng Lagoon; KAVIENG 2014, KR30, 02°35,5'S, 150°47,2'E, 6 m	2	This paper			OR616102	OR625821
Phenacovolva nectarea	MNHN-IM-2013-50643	Papua New Guinea, Kavieng Lagoon; KAVIENG 2014, KR30, 02°35,5'S, 150°47,2'E, 6 m	2	This paper	Astrogorgiidae		OR616103
Aclyvolva coarctata	MNHN-IM-2013-51138	Papua New Guinea, Kavieng Lagoon; KAVIENG 2014, KR48, 02°45,2'S, 150°43,1'E, 3-42 m	17	This paper	Ellisellidae°	Ellisella	OR616104	OR625822	OR625997
Dentiovula eizoi*	MNHN-IM-2013-51140	Papua New Guinea, Kavieng Lagoon; KAVIENG 2014, KR48, 02°45,2'S, 150°43,1'E, 3-42 m	17	This paper	Plexauridae°		OR616105	OR625823	OR625998
Aclyvolva coarctata	MNHN-IM-2013-51141	Papua New Guinea, Kavieng Lagoon; KAVIENG 2014, KR48, 02°45,2'S, 150°43,1'E, 3-42 m	17	This paper	Ellisellidae°	Ellisella	OR616106	OR625824
Prosimnia semperi*	MNHN-IM-2013-51404	Papua New Guinea, Kavieng Lagoon; KAVIENG 2014, KA01, 02°43,1'S, 150°36,8'E	17	This paper	Melithaeidae°	Melithaea	OR616107	OR625825	OR625999
Prosimnia semperi	MNHN-IM-2013-51443	Papua New Guinea, Kavieng Lagoon; KAVIENG 2014, KA01, 02°43,1'S, 150°36,8'E	17	This paper	Melithaeidae°	Melithaea	OR616108	OR625826	OR626000
Phenacovolva lahainaensis*	MNHN-IM-2013-51707	Papua New Guinea, Kavieng Lagoon; KAVIENG 2014, KR56NO DATA, 12785 m	17	This paper	Antipathidae	Antipathella	OR616109	OR625827
Phenacovolva nectarea	MNHN-IM-2013-51899	Papua New Guinea, Kavieng Lagoon; KAVIENG 2014, KR60, 02°41,7'S, 150°38,4'E, 3-19 m	17	This paper			OR616110	OR625828
Diminovula culmen	MNHN-IM-2013-51980	Papua New Guinea, Kavieng Lagoon; KAVIENG 2014, KZ06, 02°37'S, 150°46,3'E, 6-12 m	17	This paper	Nephtheidae°	Dendronepthia	OR616111	OR625829	OR626001
Dentiovula eizoi	MNHN-IM-2013-5317	Papua New Guinea, N Kranket I.; Papua Niugini, PR129, 05°11,3'S, 145°49,5'E, 1-24 m	18	This paper	Plexauridae°		OR616112	OR625830
Pedicularia vanderlandi	MNHN-IM-2013-53606	Papua New Guinea, Kavieng Lagoon; KAVIENG 2014, KR66, 02°42,6'S, 150°36,7'E, 1-44 m	17	This paper	Stylasteridae°	Disticopora		OR625831
Pedicularia vanderlandi	MNHN-IM-2013-53607	Papua New Guinea, Kavieng Lagoon; KAVIENG 2014, KR66, 02°42,6'S, 150°36,7'E, 1-44 m	17	This paper			OR616113
Pedicularia pacifica	MNHN-IM-2013-53608	Papua New Guinea, Kavieng Lagoon; KAVIENG 2014, KR66, 02°42,6'S, 150°36,7'E, 1-44 m	17	This paper	Stylasteridae°	Disticopora		OR625832
Pedicularia vanderlandi	MNHN-IM-2013-53609	Papua New Guinea, Kavieng Lagoon; KAVIENG 2014, KR66, 02°42,6'S, 150°36,7'E, 1-44 m	17	This paper	Stylasteridae°	Disticopora	OR616114	OR625833
Pedicularia vanderlandi	MNHN-IM-2013-53610	Papua New Guinea, Kavieng Lagoon; KAVIENG 2014, KR66, 02°42,6'S, 150°36,7'E, 1-44 m	17	This paper			OR616115	OR625834	OR626002
Naviculavolva kurziana	MNHN-IM-2013-53893	Papua New Guinea, Kavieng Lagoon; KAVIENG 2014, KR106, 02°40'S, 150°25,8'E, 3-47 m	17	This paper				OR625835
Amonovula piriei*	MNHN-IM-2013-53904	Papua New Guinea, Kavieng Lagoon; KAVIENG 2014, KR39, 02°40'S, 150°27,7'E, 4-16 m	17	This paper	Plexauridae°		OR616116	OR625836
Pellasimnia brunneiterma	MNHN-IM-2013-53914	Papua New Guinea, New Hanover; KAVIENG 2014, KR110, 02°40,8'S, 150°20,5'E, 4-51 m	17	This paper			OR616117	OR625837	OR626003
Pedicularia vanderlandi*	MNHN-IM-2013-53915	Papua New Guinea, New Hanover; KAVIENG 2014, KR110, 02°40,8'S, 150°20,5'E, 4-51 m	17	This paper	Stylasteridae°	Disticopora	OR616118	OR625838	OR626004
Pellasimnia brunneiterma	MNHN-IM-2013-53962	Papua New Guinea, Kavieng Lagoon; KAVIENG 2014, KR84, 02°39,4'S, 150°43,5'E, 2-16 m	17	This paper	Plexauridae		OR616119	OR625839
Phenacovolva nectarea	MNHN-IM-2013-53963	Papua New Guinea, Kavieng Lagoon; KAVIENG 2014, KR84, 02°39,4'S, 150°43,5'E, 2-16 m	17	This paper	Astrogorgiidae°			OR625840
Phenacovolva nectarea	MNHN-IM-2013-53964	Papua New Guinea, Kavieng Lagoon; KAVIENG 2014, KR84, 02°39,4'S, 150°43,5'E, 2-16 m	17	This paper	Astrogorgiidae°	Plexaura		OR625841
Phenacovolva nectarea*	MNHN-IM-2013-53965	Papua New Guinea, Kavieng Lagoon; KAVIENG 2014, KR84, 02°39,4'S, 150°43,5'E, 2-16 m	17	This paper	Astrogorgiidae°	Plexaura	OR616120	OR625842	OR626005
Phenacovolva nectarea	MNHN-IM-2013-53966	Papua New Guinea, Kavieng Lagoon; KAVIENG 2014, KR84, 02°39,4'S, 150°43,5'E, 2-16 m	17	This paper			OR616121	OR625843
Phenacovolva nectarea	MNHN-IM-2013-53967	Papua New Guinea, Kavieng Lagoon; KAVIENG 2014, KR84, 02°39,4'S, 150°43,5'E, 2-16 m	17	This paper				OR625844
Phenacovolva nectarea	MNHN-IM-2013-54000	Papua New Guinea, Kavieng Lagoon; KAVIENG 2014, KR86, 02°36,3'S, 150°31,6'E, 3-15 m	17	This paper			OR616122	OR625845
Pellasimnia brunneiterma	MNHN-IM-2013-54003	Papua New Guinea, Kavieng Lagoon; KAVIENG 2014, KR88, 02°37,2'S, 150°31,7'E, 3-32 m	17	This paper	Subergorgidae°	Annella	OR616123	OR625846	OR626006
Crenavolva aureola	MNHN-IM-2013-54048	Papua New Guinea, Kavieng Lagoon; KAVIENG 2014, KR92, 02°37,2'S, 150°31,7'E, 20-22 m	17	This paper			OR616124	OR625847
Dentiovula eizoi	MNHN-IM-2013-54265	Papua New Guinea, Kavieng Lagoon; KAVIENG 2014, KR96, 02°36,7'S, 150°32,7'E, 5-14 m	17	This paper	Plexauridae°		OR616125	OR625848
Amonovula piriei	MNHN-IM-2013-54266	Papua New Guinea, Kavieng Lagoon; KAVIENG 2014, KR96, 02°36,7'S, 150°32,7'E, 5-14 m	17	This paper	Plexauridae°		OR616126	OR625849
Aclyvolva coarctata*	MNHN-IM-2013-54312	Papua New Guinea, Kavieng Lagoon; KAVIENG 2014, KR102, 02°38,3'S, 150°27,2'E, 3-18 m	17	This paper	Ellisellidae°	Ellisella	OR616127	OR625850	OR626007
Aclyvolva coarctata	MNHN-IM-2013-54313	Papua New Guinea, Kavieng Lagoon; KAVIENG 2014, KR102, 02°38,3'S, 150°27,2'E, 3-18 m	17	This paper	Ellisellidae°	Ellisella	OR616128	OR625851
Aclyvolva coarctata	MNHN-IM-2013-54314	Papua New Guinea, Kavieng Lagoon; KAVIENG 2014, KR102, 02°38,3'S, 150°27,2'E, 3-18 m	17	This paper			OR616129	OR625852	OR626008
Pedicularia pacifica	MNHN-IM-2013-55123	Papua New Guinea, Kavieng Lagoon; KAVIENG 2014, KR158, 02°33,3'S, 150°46,4'E, 15-35 m	2	This paper	Stylasteridae°	Stylaster	OR616130	OR625853
Margovula anulata	MNHN-IM-2013-55742	Papua New Guinea, New Ireland; KAVIENG 2014, KR190, 02°42,6'S, 150°43,4'E, 3-9 m	17	This paper			OR616131	OR625854	OR626009
Margovula anulata*	MNHN-IM-2013-55743	Papua New Guinea, New Ireland; KAVIENG 2014, KR190, 02°42,6'S, 150°43,4'E, 3-9 m	17	This paper	Nephtheidae°	Dendronepthia	OR616132	OR625855
Phenacovolva nectarea	MNHN-IM-2013-5575	Papua New Guinea, S Kranket I.; Papua Niugini, PR13, 05°12,3'S, 145°48,8'E, 8-10 m	18	This paper	Astrogorgiidae			OR625856
Pellasimnia brunneiterma	MNHN-IM-2013-5578	Papua New Guinea, N Paeowa I.; Papua Niugini, PCT039, 5° 9' 45.108'' S, 145° 49' 15.636'' E	23	This paper	Plexauridae		OR616133
Simnialena uniplicata	MNHN-IM-2013-56966	France Guyane, Ile Saint-Joseph; ILES DU SALUT, SS01, 05°16,9'N, 52°35,1'W, 8 m	18	This paper	Gorgoniidae°	Leptogorgia	OR616134	OR625857
Cyphoma intermedium	MNHN-IM-2013-57291	France Guyane, Ile Saint-Joseph; ILES DU SALUT, SR23, 05°16,8'N, 52°34,9'W, 6-10 m	18	This paper	Gorgoniidae°	Leptogorgia	OR616135	OR625858	OR626010
Simnialena uniplicata*	MNHN-IM-2013-57299	France Guyane, Ile Saint-Joseph; ILES DU SALUT, SR23, 05°16,8'N, 52°34,9'W, 6-10 m	18	This paper	Gorgoniidae°		OR616136	OR625859	OR626011
Pellasimnia brunneiterma	MNHN-IM-2013-5858	Papua New Guinea, Karamket/Secomar?; Papua Niugini, PR170	17	This paper	Subergorgiidae		OR616137	OR625860
Crenavolva striatula	MNHN-IM-2013-5878	Papua New Guinea, Yabob; Papua Niugini, PR175	18	This paper	Gorgoniidae°	Leptogorgia		OR625861
Pedicularia pacifica	MNHN-IM-2013-5882	Papua New Guinea, S Sek I.; Papua Niugini, PB35, 05°07'S, 145°49,4'E, 12 m	18	This paper			OR616138	OR625862
Pedicularia pacifica	MNHN-IM-2013-5905	Papua New Guinea, Yabob; Papua Niugini, PR175	18	This paper	Stylasteridae°	Disticopora	OR616139	OR625863
Volva kilburni	MNHN-IM-2013-59053	New Caledonia, New Ireland; KAVIENG, CP4502, 22°48'S, 167°07'E, 405-410 m	26	This paper			OR616140	OR625864
Phenacovolva nectarea	MNHN-IM-2013-5937	Papua New Guinea, S Sek I.; Papua Niugini, PR183	18	This paper				OR625865
Pellasimnia brunneiterma	MNHN-IM-2013-5938	Papua New Guinea, S Sek I.; Papua Niugini, PR183	18	This paper			OR616141	OR625866
Cyphoma intermedium	MNHN-IM-2013-60490	Guadeloupe, E La Désirade; KARUBENTHOS 2, DW4553, 16°21'N, 60°54'W, 111-162 m	15	This paper			OR616142	OR625867
Simnia sp.*	MNHN-IM-2013-60781	Guadeloupe, E La Désirade; KARUBENTHOS 2, DW4575, 16°21'N, 60°53'W, 79-165 m	15	This paper			OR616143	OR625868	OR626012
Contrasimnia formosana	MNHN-IM-2013-61917	China Sea, N. Macclesfield bank; ZhongSha 2015, CP4146, 16°09'N, 114°16'E, 232-314 m	15	This paper			OR616144	OR625869
Contrasimnia formosana	MNHN-IM-2013-61918	China Sea, N. Macclesfield bank; ZhongSha 2015, CP4146, 16°09'N, 114°16'E, 232-314 m	15	This paper			OR616145	OR625870
Contrasimnia formosana	MNHN-IM-2013-61922	China Sea, N. Macclesfield bank; ZhongSha 2015, CP4146, 16°09'N, 114°16'E, 232-314 m	15	This paper			OR616146	OR625871
Contrasimnia xanthochila	MNHN-IM-2013-61951	China Sea, N. Macclesfield bank; ZhongSha 2015, CP4148, 16°07'N, 114°19'E, 218-281 m	15	This paper			OR616147	OR625872	OR626013
Contrasimnia xanthochila*	MNHN-IM-2013-61952	China Sea, N. Macclesfield bank; ZhongSha 2015, CP4148, 16°07'N, 114°19'E, 218-281 m	15	This paper			OR616148	OR625873	OR626014
Quasisimnia sp.*	MNHN-IM-2013-63254	New Caledonia, SE Ile des Pins; KANACONO, DW4780, 22°59'S, 167°48'E, 238-295 m	26	This paper			OR616149	OR625874
Gen. sp.	MNHN-IM-2013-63255	New Caledonia, Mont Munida; KANACONO, CP4779, 23°02'S, 168°17'E, 270-293 m	13	This paper			OR616150	OR625875	OR626015
Gen. sp.	MNHN-IM-2013-63256	New Caledonia, SE Ile des Pins; KANACONO, DW4780, 22°59'S, 167°48'E, 238-295 m	26	This paper				OR625876
Pseudocypraea exquisita*	MNHN-IM-2013-63257	New Caledonia, SE Ile des Pins; KANACONO, DW4780, 22° 58' 40.1988'' S, 167° 47' 30.0192'' E, 238-295 m	20	This paper			OR616151	OR625877
Pedicularia elegantissima	MNHN-IM-2013-65607	New Caledonia, Argo Bank; Kanadeep, DW4962, 23°02'S, 159°28'E, 315-1260 m	13	This paper	Stylasteridae°	Stylaster	OR616152	OR625878
Pedicularia elegantissima	MNHN-IM-2013-68397	New Caledonia, SW Ile des Pins; KANACONO, DW4661, 22° 48' 18'' S, 167° 7' 7.2048'' E, 405-410 m	20	This paper			OR616153	OR625879
Pedicularia elegantissima	MNHN-IM-2013-68463	New Caledonia, SW Ile des Pins; KANACONO, DW4661, 22°48'S, 167°07'E, 405-410 m	26	This paper			OR616154	OR625880
Ovula ishibashii	MNHN-IM-2013-68826	New Caledonia, S Ile des Pins; KANACONO, DW4672, 22° 46' 59.9988'' S, 167° 26' 5.9928'' E, 290 -310 m	20	This paper			OR616155	OR625881	OR626016
Gen. sp.	MNHN-IM-2013-68846	New Caledonia, S Ile des Pins; KANACONO, DW4678, 22°43'S, 167°02'E, 150- m	26	This paper			OR616156	OR625882	OR626017
Crenavolva traillii	MNHN-IM-2013-69651	New Caledonia, W Ile des Pins; KANACONO, DW4727, 22°41'S, 167°02'E, 120-129 m	26	This paper			OR616157	OR625883
Aclyvolva sp.	MNHN-IM-2013-69669	New Caledonia, W Ile des Pins; KANACONO, DW4727, 22°41'S, 167°02'E, 120-129 m	26	This paper			OR616158	OR625884
Cymbovula acicularis	MNHN-IM-2013-71258	New Caledonia, Baie du Galion; KANACONO, AR095, 22° 48' 18'' S, 167° 7' 7.2048'' E, 1-17 m	20	This paper			OR616159	OR625885
Cyphoma intermedium	MNHN-IM-2013-7997	Guadeloupe, Grand cul de sac marin; KARUBENTHOS 2012, GR04, 16°21,97'N, 61°38,09'W, 23 m	15	This paper			OR616160	OR625886
Crenavolva traillii	MNHN-IM-2013-84169	KOUMAC, Pointe Deverd; KOUMAC, KR852, 20° 45' 10.8'' S, 164° 22' 11.784'' E	16	This paper			OR616161		OR626018
Prosimnia semperi	MNHN-IM-2013-84729	KOUMAC, Pointe Grand Récif Mathieu; KOUMAC, KR858, 20° 45' 17.1'' S, 164° 13' 46.812'' E	16	This paper			OR616162	OR625887
Cyphoma intermedium	MNHN-IM-2013-8520	Guadeloupe, Anse Babin (Morne-à-l’eau); KARUBENTHOS 2012, GM02, 16°20,45'N, 61°31,55'W, 1 m	15	This paper			OR616163	OR625888
Crenavolva traillii*	MNHN-IM-2013-85207	KOUMAC, Pointe Deverd; KOUMAC, KR207, 20° 45' 24.552'' S, 164° 22' 53.688'' E	16	This paper	Paramuriceidae°	Paracis	OR616164	OR625889
Pedicularia granulata*	MNHN-IM-2013-9609	Papua New Guinea, E Karkar I.; Papua Niugini, DW3973, 04°34'S, 146°17'E, 422-430 m	23	This paper	Stylasteridae°	Adelopora	OR616165	OR625890
Pedicularia granulata	MNHN-IM-2013-9610	Papua New Guinea, E Karkar I.; Papua Niugini, DW3973, 04°34'S, 146°17'E, 422-430 m	23	This paper	Stylasteridae°	Adelopora	OR616166	OR625891
Lunovula superstes	MNHN-IM-2013-9695	Papua New Guinea, Vitiaz Strait; Papua Niugini, DW3992, 06°03'S, 147°36'E, 450 -480 m	14	This paper			OR616167	OR625892
Phenacovolva lahainaensis	MNHN-IM-2019-15202	Madagascar, Manantenina; ATIMO VATAE, TA34, 24° 45' 38.1024'' S, 47° 12' 24.4188'' E, 14 -23 m	34	This paper	Antipathidae	Antipathella	OR616170	OR625896
Phenacovolva lahainaensis	MNHN-IM-2019-15203	Madagascar, Manantenina; ATIMO VATAE, TA34, 24° 45' 38.1024'' S, 47° 12' 24.4188'' E, 55 m	34	This paper			OR616171
Gen. sp.	MNHN-IM-2019-15204	Madagascar, Cap Sainte Marie; ATIMO VATAE, BV07, 25° 35' 24.9612'' S, 45° 8' 2.2848'' E, 12 m	34	This paper	Gorgoniidae	Leptogorgia	OR616172	OR625897	OR626019
Pedicularia sp.*	MNHN-IM-2019-16209	Mozambik canal, Iles Glorieuses; BIOMAGLO, DW4808, 11°30'S, 47°28'E, 219-224 m	21	This paper			OR616173	OR625898
Lunovula superstes	MNHN-IM-2019-16269	New Caledonia, E Atoll de la Surprise; SPANBIOS, DW5211, 163°10'E, 18°07'S	22	This paper			OR616174	OR625899
Pedicularia elegantissima	MNHN-IM-2019-16270	New Caledonia, E Atoll de la Surprise; SPANBIOS, DW5237, 163°00,9'E, 18°04,5'S	22	This paper	Stylasteridae		OR616175
Pedicularia elegantissima	MNHN-IM-2019-16271	New Caledonia, E Atoll de la Surprise; SPANBIOS, DW5237, 163°00,9'E, 18°04,5'S	22	This paper			OR616176
Pedicularia elegantissima	MNHN-IM-2019-16272	New Caledonia, E Atoll de la Surprise; SPANBIOS, DW5237, 163°00,9'E, 18°04,5'S	22	This paper	Stylasteridae		OR616177
Calcarovula longirostrata	MNHN-IM-2019-16273	New Caledonia, S Atoll Pelotas; Spanbios, CP 5157, 5° 11' 44.5812'' S , 145° 50' 48.156'' E	23	This paper			OR616178	OR625900
Volva kilburni	MNHN-IM-2019-16277	New Caledonia, Au large de Canala; Spanbios, CP 5285, 21° 25' 13.5588'' S, 166° 11' 46.3812'' E, 239 -244 m	24	This paper			OR616179	OR625901
Dentiovula oryza*	MNHN-IM-2019-18294	New Caledonia, Banc Sud Durand; EXBODI, DW3855, 22°19'S, 168°41'E	26	This paper	Siphonogorgiidae°	Siphonogorgia	OR616183	OR625905	OR626021
Calcarovula longirostrata*	MNHN-IM-2019-18295	Mozambique, BAIE DE MAPUTO: Inhaca; INHACA 2011, MR10, 26°05.4'S, 33°00.5'E, 17-28 m	25	This paper	Paramuriceidae°		OR616184	OR625906
Volva kilburni	MNHN-IM-2019-18296	New Caledon, Au large passe d'Ouénou; EXBODI, CP3828, 22°00'S, 167°01'E, 300 -302 m	26	This paper			OR616185	OR625907	OR626022
Lunovula superstes	MNHN-IM-2019-18297	New Caledon, Teal Pass; EXBODI, CP3842, 22°23'S, 167°22'E, 756-769 m	26	This paper			OR616186	OR625908
Pellasimnia angasi*	MNHN-IM-2019-18300	WESTERN AUSTRALIA , Esperance; WESTERN AUSTRALIA 2012, WE01, 15° 16' 56.244'' S, 124° 6' 18'' E, 11 m	27	This paper			OR616187	OR625909	OR626023
Pedicularia elegantissima	MNHN-IM-2019-18303	Mozambik canal, Iles Glorieuses; BIOMAGLO, DW4807, 11°30'S, 47°28'E, 97-124 m	21	This paper				OR625910
Pedicularia elegantissima	MNHN-IM-2019-18318	New Caledonia, Atoll Pelotas; SPANBIOS, DW5227, 18°15,4'S, 163°00,9'E, 246-256 m	9	This paper	Stylasteridae	Lepidotheca	OR616188	OR625911
Pedicularia elegantissima	MNHN-IM-2019-18319	New Caledonia, S Atoll Pelotas; SPANBIOS, DW5153, 20°06,5'S, 163°45,4'E, 262-292m	16	This paper	Stylasteridae	Crypthelia	OR616189	OR625912	OR626024
Pedicularia elegantissima*	MNHN-IM-2019-18322	New Caledonia, S Atoll Pelotas; SPANBIOS, DW5176, 20°06,5'S, 163°45,4'E, 498 -526 m	28	This paper	Stylasteridae	Crypthelia	OR616190	OR625913	OR626025
Pedicularia elegantissima	MNHN-IM-2019-18323	New Caledonia, SE Ile des Pins; KANACONO, DW4780, 22°59'S, 167°48'E, 238 -295 m	26	This paper	Stylasteridae	Inferiolabiata	OR616191	OR625914	OR626026
Pedicularia elegantissima	MNHN-IM-2019-18324	New Caledonia, Grand Passage; CONCALIS, DW2979, 18°16'S, 162°54'E, 350 m	9	This paper			OR616192	OR625915
Pedicularia pacifica	MNHN-IM-2019-18431	Papua New Guinea, Kavieng Lagoon; KAVIENG 2014, KR122, 02°32,5'S, 150°35,3'E, 7-41 m	2	This paper	Stylasteridae	Distichopora	OR616193	OR625916
Lunovula superstes	MNHN-IM-2019-20022	New Caledonia, E Atoll de la Surprise; SPANBIOS, DW5237, 163°00,9'E, 18°04,5'S, 339 -356 m	22	This paper				OR625917
Pedicularia elegantissima	MNHN-IM-2019-20024	New Caledonia, E Atoll de la Surprise; SPANBIOS, DW5237, 163°00,9'E, 18°04,5'S, 339 -356 m	22	This paper	Stylasteridae	Stylaster	OR616194	OR625918
Pedicularia elegantissima	MNHN-IM-2019-20028	New Caledonia, E Atoll de la Surprise; SPANBIOS, DW5237, 163°00,9'E, 18°04,5'S, 339 -356 m	22	This paper	Stylasteridae	Stylaster	OR616195
Pedicularia elegantissima	MNHN-IM-2019-20029	New Caledonia, E Atoll de la Surprise; SPANBIOS, DW5237, 163°00,9'E, 18°04,5'S, 339 -356 m	22	This paper	Stylasteridae	Stylaster	OR616196
Lunovula superstes	MNHN-IM-2019-20031	New Caledonia, E Atoll de la Surprise; SPANBIOS, DW5237, 163°00,9'E, 18°04,5'S, 339 -356 m	22	This paper			OR616197	OR625919
Pedicularia vanderlandi	MNHN-IM-2019-22806	Vanuatu , W Malo Island; Santo 2006, DR50, 15°38,7'S, 167°05,2'E, 10-17 m	3	This paper	Stylasteridae°		OR616198	OR625920
Simnia spelta	MNHN-IM-2019-22807	Corse, Ota port; Corsicabenthos_3	6	This paper	Eunicellidae	Eunicella	OR616199	OR625921
Simnia spelta	MNHN-IM-2019-22808	Corse, Ota port; Corsicabenthos_3	6	This paper	Eunicellidae	Eunicella	OR616200	OR625922
Simnia spelta	MNHN-IM-2019-22809	Corse, Ota port; Corsicabenthos_3	6	This paper	Eunicellidae	Eunicella	OR616201	OR625923
Simnia spelta	MNHN-IM-2019-22810	Corse, Ota port; Corsicabenthos_3	6	This paper	Eunicellidae	Eunicella	OR616202	OR625924
Gen. sp.	MNHN-IM-2019-22812	Vanuatu; Santo 2006	3	This paper	Subergorgiidae			OR625926
Simnia spelta	MNHN-IM-2019-6537	Corse, Parc naturel marin du cap Corse et de l'Agriate; CORSICABENTHOS 1, CR48, 42° 45' 58.212'' N , 9° 6' 29.412'' E	32	This paper			OR616206	OR625929
Pedicularia pacifica	MNHN-IM-2019-67747	Marquesas Islands, Grotte Hatutaa; PAKAIHI I TE MOANA, MQ32-GR, 7° 54' 23.22'' S, 140° 33' 57.9636''W, 17 -22 m	19	This paper			OR616207	OR625930
Aclyvolva coarctata	MNHN-IM-2019-7575	New Caledonia, roche de l'Infernet; KOUMAC 2.3, KR880, 20° 38' 41.928'' S, 164° 14' 38.652'' E	16	This paper			OR616208
Ovula costellata*	MNHN-IM-2019-7576	New Caledonia, roche de l'Infernet; KOUMAC 2.3, KR880, 20° 38' 41.928'' S, 164° 14' 38.652'' E	16	This paper			OR616209	OR625931	OR626029
Crenavolva traillii	MNHN-IM-2019-7593	New Caledonia; KOUMAC 2.3, KR1026, 20° 34' 20.64'' S, 164° 13' 32.52'' E	16	This paper			OR616210	OR625932	OR626030
Crenavolva traillii	MNHN-IM-2019-7595	New Caledonia; KOUMAC 2.3, KR1026, 20° 34' 20.64'' S, 164° 13' 32.52'' E	16	This paper			OR616211
Primovula rosewateri	MNHN-IM-2019-7609	New Caledonia; KOUMAC 2.3, KR907, 20° 34' 20.388'' S, 164° 13' 32.412'' E	16	This paper			OR616212	OR625933	OR626031
Primovula rosewateri	MNHN-IM-2019-7610	New Caledonia; KOUMAC 2.3, KR907, 20° 34' 20.388'' S, 164° 13' 32.412'' E	16	This paper			OR616213	OR625934
Naviculavolva kurziana	MNHN-IM-2019-8310	New Caledonia, Extérieur les 2 frères; KOUMAC 2.3, KR1031, 20° 35' 35.448'' S, 164° 6' 3.852'' E, 45 m	16	This paper	Isididae°	Rumphella	OR616214	OR625935
Pedicularia vanderlandi	MNHN-IM-2019-8322	New Caledonia, Grand coude; KOUMAC 2.3, KB632, 20° 35' 35.448'' S, 164° 12' 11.052'' E	16	This paper			OR616215	OR625936
Pedicularia pacifica	MNHN-IM-2019-9177	New Caledonia; KOUMAC 2.3, KR1049, 20° 40' 32.628'' S, 164° 13' 1.56'' E	16	This paper			OR616216	OR625937	OR626032
Phenacovolva lahainaensis	MNHN-IM-2019-9190	New Caledonia, Grand récif de Koumac; KOUMAC 2.3, KL28, 20° 47' 18.06'' S, 164° 16' 19.992'' E	16	This paper			OR616217	OR625938	OR626033
Simnia spelta	MNHN-IM-2019-13124	Corse, Sec St Antonio; CORSICABENTHOS 2, CR74, 41° 20' 22.6788'' N, 9° 10' 56.9388'' E, 40 -44 m	32	This paper			OR616168	OR625893
Simnia spelta	MNHN-IM-2019-14589	Corse, Extrême Sud; CORSICABENTHOS 2, CR101, 41° 20' 26.2788'' N, 9° 10' 49.08'' E	32	This paper			OR616169	OR625894
Simnia spelta	MNHN-IM-2019-14592	Corse, Extrême Sud; CORSICABENTHOS 2, CR101, 41° 20' 26.2788'' N, 9° 10' 49.08'' E	32	This paper				OR625895
Simnia spelta	MNHN-IM-2019-16493	Corse, Entre l'île de Gargalo et l'île de Garganellu; Corsicabenthos_3, CR109, 42° 21' 58.2588'' N, 8° 32' 30.1812'' E	32	This paper	Eunicellidae°	Eunicella	OR616180	OR625902
Simnia spelta	MNHN-IM-2019-17274	Corse, Nord île de Gargalo; Corsicabenthos_3, CR122, 21° 4' 6.8412'' S, 165° 41' 49.4988'' E, 25 -39 m	24	This paper			OR616181	OR625903
Pseudosimnia carnea*	MNHN-IM-2019-18135	Corse, Sud Ile de Garganellu; Corsicabenthos_3, CR154, 42° 21' 51.66'' N , 8° 32' 19.5612'' E, 3-51 m	32	This paper	Alcyoniidae	Alcyonium	OR616182	OR625904	OR626020
Simnia spelta	MNHN-IM-2019-22811	Corse, Ota port; Corsicabenthos_3	6	This paper	Eunicellidae	Eunicella	OR616203	OR625925	OR626027
Simnia spelta	MNHN-IM-2019-5188	Corse, Parc naturel marin du cap Corse et de l'Agriate; CORSICABENTHOS 1, CR14, 42° 47' 9.096'' N , 9° 19' 47.46'' E, 40 -44 m	32	This paper	Eunicellidae°	Eunicella	OR616204	OR625927
Simnia spelta*	MNHN-IM-2019-6536	Corse, Parc naturel marin du cap Corse et de l'Agriate; CORSICABENTHOS 1, CR48, 42° 45' 58.212'' N, 9° 6' 29.412'' E	32	This paper	Eunicellidae	Eunicella	OR616205	OR625928	OR626028
Margovula marginata*	Ov-CT-1486	Vietnam, Bái Tử Long Bay, Tây Island; Islands 2021, CT6, 20°59'07.5"N, 107°47'47.6"E, 10 m	28	This paper	Nephtheidae°	Dendronephthya	OR616218	OR625939
Crenavolva traillii	Ov-NT-1285	Vietnam, Nha Trang Bay, Nội Island; Nha Trang 2021, 12°02'49.7"N, 109°19'37.1"E, 25 m	29	This paper	Paramuriceidae	Menella	OR616219
Diminovula culmen	Ov-NT-1289	Vietnam, Nha Trang Bay, Nọc Island; Nha Trang 2021, 12°11.417'N, 109°20.478'E, 20 m	47	This paper	Nephtheidae	Dendronephthya	OR616220		OR626034
Habuprionovolva sp.	Ov-NT-1302	Vietnam, Nha Trang Bay, Nọc Island; Nha Trang 2021, 12°11.417'N, 109°20.478'E, 20 m	47	This paper	Nephtheidae	Dendronephthya	OR616221	OR625940	OR626035
Crenavolva traillii	Ov-NT-1679	Vietnam, Nha Trang Bay, Nọc Island; Nha Trang 2022, 12°10'58.7"N, 109°17'37.5"E, 8 m	47	This paper	Paramuriceidae	Menella	OR616222
Diminovula culmen	Ov-NT-1682	Vietnam, Nha Trang Bay, Nọc Island; Nha Trang 2022, 12°11.417'N, 109°20.478'E, 20 m	47	This paper	Nephtheidae	Dendronephthya	OR616223
Habuprionovolva sp.	Ov-NT-1683	Vietnam, Nha Trang Bay, Nọc Island; Nha Trang 2022, 12°11.417'N, 109°20.478'E, 20 m	47	This paper	Nephtheidae	Dendronephthya	OR616224	OR625941	OR626036
Crenavolva traillii	Ov-NT-1686	Vietnam, Nha Trang Bay, Nọc Island; Nha Trang 2022, 12°11.417'N, 109°20.478'E, 30 m	47	This paper	Paramuriceidae°	Menella	OR616225
Procalpurnus lacteus*	Ov-NT-1687	Vietnam, Nha Trang Bay, Nọc Island; Nha Trang 2022, 12°11.417'N, 109°20.478'E, 30 m	47	This paper	Paramuriceidae°	Menella	OR616226
Diminovula margarita*	Ov-SP-1444	Vietnam, Spratly Islands, Toc Tan; Spratly 2021, D37, 08°49'12,1''N, 113°56'18,8''E, 18 m	11	This paper	Nephtheidae	Dendronephthya	OR616227
Diminovula concinna*	Ov-SP-1700	Vietnam, Spratly Islands, Da Nam; Spratly 2022, d104, 11°23'9.45"N, 114°18'29.58"E, 9 m	29	This paper	Coelogorgiidae	Coelogorgia	OR616228		OR626037
Simnia spelta	Roma3-S10	Spain, Capo de Paolos; 37°38’N , 000°41’E, 30 m	30	This paper	Eunicellidae	Eunicella	OR616229
Simnia spelta	Roma3-S11	Italy, Cape Marrargiu; 30 m	7	This paper	Eunicellidae	Eunicella	OR616230	OR625942	OR626038
Simnia spelta	Roma3-S3	Italy, Ponza Is; 40°52’56’’N, 012°57’ 57’’E, 25 m	31	This paper	Eunicellidae	Eunicella	OR616231	OR625943
Simnia spelta	Roma3-S4	Italy, Giannutri Is.; 42°15’07’’N , 011°07’ 04’’E, 25 m	32	This paper	Eunicellidae	Eunicella	OR616232
Simnia spelta	Roma3-S5	Spain, Medas Is.; 42°02’41’’N, 003°13’41’’E, 30 m	33	This paper	Eunicellidae	Eunicella	OR616233	OR625944
Simnia spelta	Roma3-S6	Spain, Medas Is.; 42°02’41’’N, 003°13’41’’E, 30 m	33	This paper	Eunicellidae	Eunicella	OR616234	OR625945
Simnia spelta	Roma3-S7	Spain, Cap de Creus; 42°19’N , 003°20’E, 30 m	33	This paper	Eunicellidae	Eunicella	OR616235
Simnia spelta	Roma3-S8	Spain, Cap de Creus; 42°19’N , 003°20’E, 30 m	33	This paper	Eunicellidae	Eunicella	OR616236
Simnia spelta	Roma3-S9	Spain, Capo de Paolos; 37°38’N , 000°41’E, 30 m	30	This paper	Eunicellidae	Eunicella	OR616237	OR625946
GENBANK
Simnia patula		North Sea	45	Barco et al., 2015			MT09425
Simnia patula	Gastr-8781V	Svezia, Sweden: Skagerrak	43	K. G. Lundin, unpublished			MG935117
Simnia patula	Gastr-8783V	Svezia, Sweden: Skagerrak	43	K. G. Lundin, unpublished			MG935026
Prionovolva brevis	BJLinnSoc-12	Filippine, Cebu, Olango Island	39	Meyer 2002			AY161624	AY161391
Phenacovolva nectarea	BJLinnSoc-14	Indonesia, Manado	37	Meyer 2002			AY161626	AY161393
Phenacovolva lahainaensis	BJLinnSoc-16	Filippine, Bohol, Balicasag	39	Meyer 2002			AY161628	AY161395
Calpurnus verrucosus	BJLinnSoc-18	Indonesia, Lombok	38	Meyer 2002			AY161630	AY161397
Procalpurnus lacteus	BJLinnSoc-19	Filippine, Guam	39	Meyer 2002			AY161631	AY161398
Ovula ovum	BJLinnSoc-20	Indonesia, Spermonde	38	Meyer 2002			AY161632	AY161399
Cyphoma gibbosum	BJLinnSoc-21	Florida USA	40	Meyer 2002			AY161633	AY161400
Simnia avena	BJLinnSoc-22			Meyer 2002			AY161634	AY161401
Jenneria pustulata	BJLinnSoc-23	Mexico, Puerto Vallarta	41	Meyer 2002			AY161635	AY161402
Pseudocypraea adamsonii	BJLinnSoc-24	Tanzania, Dar es Salaam, Zanzibar	42	Meyer 2002			AY161636	AY161403
Pseudocypraea exquisita				C. P. Meyer, unpublished			AY534428.1	AY534351
Diminovula concinna				C. P. Meyer, unpublished			AY534430.1	AY534353
Cyphoma gibbosum	USNM-IZ-1448103	Florida USA, Gulf Stream off Fort Pierce	40	Pappalardo et al., 2021			MW124460
Cymbovula acicularis	RMNH-100779	Curaçao, barank'i karanito	47	Reijnen and van der Meij 2010				GU363434
Cyphoma gibbosum	RMNH-Mol-100767	Curaçao, Blauwbaai,; CUR.10, 12°22’29.9”N, 12°22’29.9”N, 8 m	47	Reijnen and van der Meij 2010	Gorgoniidae		KT372440		KT372470
Cyphoma gibbosum	RMNH-Mol-100776	Curaçao, Playa Geremy; CUR.12, 12°19’44.1”N, 12°19’44.1”N, 17 m	47	Reijnen and van der Meij 2010	Plexauridae			KT372455	KT372471
Cyphoma gibbosum	RMNH-Mol-100780	Curaçao, barank'i karanito; CUR.15, 12°02’13.5”N, 12°02’13.5”N, 10 m	29	Reijnen and van der Meij 2010	Briareidae			GU363428
Cyphoma gibbosum	RMNH-Mol-100781	Curaçao, barank'i karanito; CUR.15, 12°02’13.5”N, 12°02’13.5”N, 9 m	29	Reijnen and van der Meij 2010	Gorgoniidae			GU363432	KT372473
Cyphoma gibbosum	RMNH-Mol-100804	Curaçao, sint michielsbaai; CUR.21, 12°08’50.9”N, 12°08’50.9”N, 14 m	47	Reijnen and van der Meij 2010	Plexauridae			GU363431	KT372475
Cyphoma gibbosum	RMNH-Mol-100809	Curaçao, superior producer; CUR.22, 12°05’21.5”N, 12°05’21.5”N, 18 m	47	Reijnen and van der Meij 2010	Briareidae			GU363433	KT372476
Cyphoma gibbosum	RMNH-Mol-100811	Curaçao, superior producer; CUR.22, 12°05’21.5”N, 12°05’21.5”N, 5 m	47	Reijnen and van der Meij 2010	Gorgoniidae			GU363429	KT372477
Cyphoma signatum	RMNH-Mol-100828	Curaçao, Marie Pampoen; CUR.05, 12°05’42.1”N, 12°05’42.1”N, 5 m	47	Reijnen and van der Meij 2010			KT372441	KT372456	KT372478
Simnia spelta	RMNH-Mol-114096	Spagna, Begur; 41°56’08,0”N, 41°56’08,0”N, 0-15 m	32	Reijnen and van der Meij 2010			KT372442	KT372457
Cyphoma gibbosum	RMNH-Mol-337794	Curaçao, Waterfabriek; CAO.02, 12°06’31.0”N, 12°06’31.0”N	47	Reijnen and van der Meij 2010	Briareidae		KT372444	KT372459	KT372480
Cymbovula acicularis*	RMNH-Mol-337795	Curaçao, Blauwbaai; CAO.04, 12°08’05.7”N, 12°08’05.7”N, 10 m	47	Reijnen and van der Meij 2010	Gorgonidae		KT372445	KT372460	KT37248
Cymbovula acicularis	RMNH-Mol-337796	Curaçao, St. Marie; CAO.06, 12°11’53.0”N, 12°11’53.0”N, 14 m	47	Reijnen and van der Meij 2010	Gorgonidae		KT372446	KT372461	KT372482
Cyphoma gibbosum	RMNH-Mol-337799	Curaçao, Holiday beach; CAO.11, 12°06’34.1”N, 12°06’34.1”N, 4 m	47	Reijnen and van der Meij 2010			KT372447	KT372463	KT372483
Cyphoma gibbosum	RMNH-Mol-337800	Curaçao, Holiday beach; CAO.11, 12°06’34.1”N, 12°06’34.1”N, 4 m	47	Reijnen and van der Meij 2010			KT372448	KT372462	KT372484
Cymbovula acicularis	RMNH-Mol-337801	Curaçao, St. Marie; CAO.21, 12°05’26.7”N, 12°05’26.7”N, 10 m	47	Reijnen and van der Meij 2010	Gorgonidae		KT372449	KT372464	KT372485
Cyphoma signatum	RMNH-Mol-337802	Curaçao, St. Marie; CAO.21, 12°05’26.7”N, 12°05’26.7”N, 8 m	47	Reijnen and van der Meij 2010			KT372465	KT372465	KT372486
Cyphoma gibbosum	RMNH-Mol-446879	Florida USA, St. Petersburg	40	Reijnen and van der Meij 2010	Gorgoniidae			KT372466	KT372487
Cyphoma mcgintyi	RMNH-Mol-446893a	Florida USA, St. Petersburg	40	Reijnen and van der Meij 2010			KT372452	KT372467	KT372488
Cyphoma mcgintyi	RMNH-Mol-446893b	Florida USA, St. Petersburg	40	Reijnen and van der Meij 2010			KT372453	KT372468	KT372489
Cyphoma mcgintyi	RMNH-Mol-450534	Florida USA, St. Petersburg	40	Reijnen and van der Meij 2010			KT372454	KT372469
Aclyvolva coarctata	RMNH-Mol-114127	Indonesia, W. Papua	48	Reijnen and van der Meij 2019			KP259435	KP259316
Pellasimnia cf annabelae	RMNH-Mol-164047	Malesia, Sabah	49	Reijnen and van der Meij 2019			KP259436	KP259317
Primovula rosewateri	RMNH-Mol-164049	Malesia	49	Reijnen and van der Meij 2019			KP259437	KP259318
Aclyvolva coarctata	RMNH-Mol-164050	Malesia, Sabah	49	Reijnen and van der Meij 2019			KP259438	KP259319	KP259394
Aclyvolva coarctata	RMNH-Mol-164051	Malesia, Sabah	49	Reijnen and van der Meij 2019			KP259439	KP259320
Aclyvolva coarctata	RMNH-Mol-164053	Malesia, Sabah	49	Reijnen and van der Meij 2019			KP259440	KP259321
Dentiovula dorsuosa	RMNH-Mol-164061	Malesia, Sabah	49	Reijnen and van der Meij 2019			KP259442	KP259323
Primovula rosewateri*	RMNH-Mol-164062	Malesia, Sabah	49	Reijnen and van der Meij 2019	Clavulariidae	Paratelesto	KP033150	KP033142
Naviculavolva deflexa	RMNH-Mol-164066	Malesia, Sabah	49	Reijnen and van der Meij 2019			KP259443	KP259324
Ovula ovum	RMNH-Mol-164069	Malesia, Sabah; SEM.10, 04°13’04,8”N, 04°13’04,8”N	49	Reijnen and van der Meij 2019			KP259325	KP259444	KT372479
Crenavolva aureola*	RMNH-Mol-164072	Malesia, Sabah	49	Reijnen and van der Meij 2019	Acanthogorgiidae	Acanthogorgia	KP033151	KP033143
Pellasimnia cf annabelae	RMNH-Mol-164076	Indonesia, Halmahera	48	Reijnen and van der Meij 2019			KP259445	KP259326
Calpurnus verrucosus	RMNH-Mol-164077	Malesia, Sabah	49	Reijnen and van der Meij 2019			KP259446	KP259327
Calpurnus verrucosus	RMNH-Mol-164078	Indonesia, Halmahera	48	Reijnen and van der Meij 2019			KP259447	KP259328
Calpurnus verrucosus	RMNH-Mol-164079	Malesia, Sabah	49	Reijnen and van der Meij 2019			KP259448	KP259329
Ovula ovum	RMNH-Mol-164080	Indonesia, Halmahera	48	Reijnen and van der Meij 2019			KP259449	KP259330
Naviculavolva deflexa	RMNH-Mol-164094	Malesia, Sabah	49	Reijnen and van der Meij 2019			KP259450	KP259331
Dentiovula dorsuosa	RMNH-Mol-164095	Malesia, Sabah	49	Reijnen and van der Meij 2019			KP271160	KP259332
Dentiovula colobica*	RMNH-Mol-164099	Malesia, Sabah	49	Reijnen and van der Meij 2019			KP259451	KP259333
Aclyvolva coarctata	RMNH-Mol-164100	Malesia, Sabah	49	Reijnen and van der Meij 2019			KP259452	KP259334
Aclyvolva coarctata	RMNH-Mol-164104	Indonesia, Halmahera	48	Reijnen and van der Meij 2019			KP259453	KP259336
Aclyvolva coarctata	RMNH-Mol-164108	Indonesia, Halmahera	48	Reijnen and van der Meij 2019				KP271159
Pellasimnia cf annabelae	RMNH-Mol-164114	Malesia, Sabah	49	Reijnen and van der Meij 2019			KP259454	KP259337
Calpurnus verrucosus	RMNH-Mol-164117	Malesia, Sabah	49	Reijnen and van der Meij 2019			KP259455	KP259338
Aclyvolva coarctata	RMNH-Mol-164119	Malesia, Sabah	49	Reijnen and van der Meij 2019			KP259456	KP259339	KP259399
Aclyvolva coarctata	RMNH-Mol-164120	Malesia, Sabah	49	Reijnen and van der Meij 2019			KP259457	KP259340
Phenacovolva rosea	RMNH-Mol-164128	Malesia, Sabah	49	Reijnen and van der Meij 2019			KP259458	KP259341
Naviculavolva deflexa	RMNH-Mol-164130	Malesia, Sabah	49	Reijnen and van der Meij 2019			KP259459	KP259342
Amonovula piriei	RMNH-Mol-164132	Indonesia, Halmahera	48	Reijnen and van der Meij 2019			KP259460	KP259343
Amonovula piriei	RMNH-Mol-164133	Indonesia, N. sulawesi	37	Reijnen and van der Meij 2019			KP259461	KP259344
Aclyvolva coarctata	RMNH-Mol-164134	Indonesia, N. sulawesi	37	Reijnen and van der Meij 2019	Ellisellidae	Ctenocella	KP259462	KP259345	KP259401
Aclyvolva coarctata	RMNH-Mol-164135	Indonesia, N. sulawesi	37	Reijnen and van der Meij 2019	Ellisellidae	Ctenocella	KP259463	KP259346	KP259402
Amonovula piriei	RMNH-Mol-164136	Indonesia, N. sulawesi	37	Reijnen and van der Meij 2019			KP259464	KP259347
Aclyvolva coarctata	RMNH-Mol-164137	Indonesia, N. sulawesi	37	Reijnen and van der Meij 2019	Ellisellidae	Ctenocella	KP259465	KP259348	KP259403
Aclyvolva coarctata	RMNH-Mol-164140	Indonesia, Halmahera	48	Reijnen and van der Meij 2019			KP271161
Aclyvolva lanceolata	RMNH-Mol-164143	Malesia, Sabah	49	Reijnen and van der Meij 2019			KP259466	KP259349
Naviculavolva deflexa	RMNH-Mol-164145	Malesia, Sabah	49	Reijnen and van der Meij 2019			KP259467	KP259350
Naviculavolva deflexa	RMNH-Mol-164149	Malesia, Sabah	49	Reijnen and van der Meij 2019			KP259468	KP259352
Dentiovula dorsuosa	RMNH-Mol-164150	Malesia, Sabah	49	Reijnen and van der Meij 2019			KP259469	KP259353
Aclyvolva lanceolata	RMNH-Mol-164152	Malesia, Sabah	49	Reijnen and van der Meij 2019			KP259470	KP259354	KP259404
Naviculavolva deflexa	RMNH-Mol-164153	Malesia, Sabah	49	Reijnen and van der Meij 2019			KP259471	KP259355
Aclyvolva lanceolata	RMNH-Mol-164154	Malesia, Sabah	49	Reijnen and van der Meij 2019			KP259472	KP259356	KP259405
Naviculavolva deflexa	RMNH-Mol-164155	Malesia, Sabah	49	Reijnen and van der Meij 2019			KP259473	KP259357
Aclyvolva coarctata	RMNH-Mol-164158	Malesia, Sabah	49	Reijnen and van der Meij 2019			KP259474	KP259358
Aclyvolva coarctata	RMNH-Mol-164161	Malesia, Sabah	49	Reijnen and van der Meij 2019	Ellisellidae	Ctenocella	KP259475	KP259359	KP259407
Pellasimnia cf annabelae	RMNH-Mol-164162	Malesia, Sabah	49	Reijnen and van der Meij 2019			KP259476	KP259360
Aclyvolva lanceolata	RMNH-Mol-164165	Malesia, Sabah	49	Reijnen and van der Meij 2019	Ellisellidae	Junceella	KP259478	KP259362	KP259408
Aclyvolva coarctata	RMNH-Mol-164167	Malesia, Sabah	49	Reijnen and van der Meij 2019	Ellisellidae	Ctenocella	KP259479	KP259363	KP259409
Aclyvolva lanceolata	RMNH-Mol-164169	Malesia, Sabah	49	Reijnen and van der Meij 2019			KP259480	KP259364	KP259410
Naviculavolva deflexa	RMNH-Mol-164173	Malesia, Sabah	49	Reijnen and van der Meij 2019			KP259481	KP259365
Diminovula alabaster*	RMNH-Mol-164174	Malesia, Sabah	49	Reijnen and van der Meij 2019			KP259482	KP259366
Aclyvolva coarctata	RMNH-Mol-164175	Malesia, Sabah	49	Reijnen and van der Meij 2019			KP259483	KP259367
Aclyvolva coarctata	RMNH-Mol-164177	Malesia, Sabah	49	Reijnen and van der Meij 2019	Ellisellidae	Ctenocella	KP259484	KP259368	KP259412
Aclyvolva lanceolata	RMNH-Mol-164179	Malesia, Sabah	49	Reijnen and van der Meij 2019			KP259485	KP259369	KP259413
Aclyvolva lanceolata	RMNH-Mol-164181	Malesia, Sabah	49	Reijnen and van der Meij 2019			KP259486	KP259370
Hiatavolva depressa	RMNH-Mol-164182	Malesia, Sabah	49	Reijnen and van der Meij 2019			KP259487	KP259371	KP259415
Aclyvolva lanceolata	RMNH-Mol-164183	Malesia, Sabah	49	Reijnen and van der Meij 2019			KP259488	KP259372	KP259416
Aclyvolva coarctata	RMNH-Mol-164185	Malesia, Sabah	49	Reijnen and van der Meij 2019	Ellisellidae	Ctenocella	KP259489	KP259373	KP259417
Pellasimnia cf annabelae	RMNH-Mol-164187	Malesia, Sabah	49	Reijnen and van der Meij 2019			KP259490	KP259374
Aclyvolva coarctata	RMNH-Mol-164188	Malesia, Sabah	49	Reijnen and van der Meij 2019	Ellisellidae	Ctenocella	KP259491	KP259375	KP259418
Aclyvolva lanceolata	RMNH-Mol-164190	Malesia, Sabah	49	Reijnen and van der Meij 2019			KP259492	KP259376	KP259419
Aclyvolva lanceolata	RMNH-Mol-164192	Malesia, Sabah	49	Reijnen and van der Meij 2019			KP259493	KP259377	KP259420
Aclyvolva lanceolata*	RMNH-Mol-164195	Malesia, Sabah	49	Reijnen and van der Meij 2019	Ellisellidae	Juncella	KP259494	KP259378	KP259421
Aclyvolva coarctata	RMNH-Mol-164197	Malesia, Sabah	49	Reijnen and van der Meij 2019			KP259495	KP259379	KP259422
Aclyvolva coarctata	RMNH-Mol-164198	Malesia, Sabah	49	Reijnen and van der Meij 2019			KP259496	KP259380	KP259423
Diminovula alabaster	RMNH-Mol-164200	Malesia, Sabah	49	Reijnen and van der Meij 2019			KP259497	KP259381
Habuprionovolva aenigma	RMNH-Mol-164215	Indonesia, Halmahera	48	Reijnen and van der Meij 2019			KP259498	KP259382
Habuprionovolva aenigma	RMNH-Mol-164216	Indonesia, Raja Ampat Island	48	Reijnen and van der Meij 2019			KP259499	KP259383
Procalpurnus lacteus	RMNH-Mol-164221	Indonesia, N. sulawesi	37	Reijnen and van der Meij 2019			KP259500	KP259384
Aclyvolva coarctata	RMNH-Mol-164234	Indonesia, N. sulawesi	37	Reijnen and van der Meij 2019	Ellisellidae	Ctenocella	KP259501	KP259385	KP259424
Aclyvolva coarctata	RMNH-Mol-164236	Indonesia, N. sulawesi	37	Reijnen and van der Meij 2019			KP259502	KP259386	KP259425
Pedicularia pacifica	RMNH-Mol-337786	Indonesia, Halmahera	48	Reijnen and van der Meij 2019			KP259503	KP259387
Aclyvolva coarctata	RMNH-Mol-337787	Indonesia, Pulau Pulau	37	Reijnen and van der Meij 2019			KP259504	KP259388	KP259426
Aclyvolva lanceolata	RMNH-Mol-337788	Thailandia, Pattaya	50	Reijnen and van der Meij 2019			KP259505		KP259427
Aclyvolva coarctata	RMNH-Mol-337789	Indonesia, N. sulawesi	37	Reijnen and van der Meij 2019			KP259506	KP259389	KP259428
Aclyvolva coarctata	RMNH-Mol-337790	Indonesia, N. sulawesi	37	Reijnen and van der Meij 2019			KP259507	KP259390	KP259429
Aclyvolva coarctata	RMNH-Mol-337791	Indonesia, N. sulawesi	37	Reijnen and van der Meij 2019	Ellisellidae	Ctenocella	KP259508	KP259391	KP259430
Aclyvolva coarctata	RMNH-Mol-337792	Indonesia, N. sulawesi	37	Reijnen and van der Meij 2019			KP259509	KP259392	KP25943
Aclyvolva lanceolata	RMNH-Mol-337793	Arabia Saudita, 16°46’ N 41°56’ E	51	Reijnen and van der Meij 2019	Ellisellidae		KP259510	KP259393	KP259432
Pedicularia vanderlandi	RMNH-Mol-99021a	Indonesia, Bali	37	Reijnen and van der Meij 2019			KP259433	KP259314
Pedicularia vanderlandi	RMNH-Mol-99021b	Indonesia, Bali	37	Reijnen and van der Meij 2019			KP259434	KP259315
Crenavolva aureola	RMNH-Mol-164085	Indonesia, Halmahera	48	Reijnen 2015	Acanthogorgiidae	Acanthogorgia	KP033152	KP033144
Crenavolva traillii	RMNH-Mol-164144	Malesia, Sabah	49	Reijnen 2015			KP033153	KP033145
Crenavolva striatula	RMNH-Mol-164186	Malesia, Sabah	49	Reijnen 2015			KP033154	KP033146
Crenavolva traillii	RMNH-Mol-164189	Malesia, Sabah	49	Reijnen 2015			KP033155	KP033147
Crenavolva aureola	RMNH-Mol-164209	Indonesia, Halmahera; 21 m	48	Reijnen 2015	Acanthogorgiidae	Acanthogorgia	KP033156	KP033148
Crenavolva chiapponii	RMNH-Mol-164211	Indonesia, Halmahera; 17 m	48	Reijnen 2015	Acanthogorgiidae	Acanthogorgia	KP033157
Crenavolva chiapponii*	RMNH-Mol-164217	Indonesia, N. sulawesi	37	Reijnen 2015	Acanthogorgia	Acanthogorgia	KP033158	KP033149
Cymbovula acicularis	RMNH-Mol-100827	Curaçao	47	Reijnen 2016			KX360174
Hiatavolva depressa	RMNH-Mol-164147	Malaysia, Pulau Banggi	49	Reijnen and Van der Meij 2019				KP259351
Simnia patula*	Spat-Simnia-patula	Curaçao	47	Reijnen et al., 2010			GU363450	GU363438
Cyphoma gibbosum	RMNH-Mol-100744	Curaçao, Marie Pampoen	47	Reijnen et al., 2010	Briareidae			GU363427
Cyphoma gibbosum*	RMNH-Mol-100812	Curaçao	47	Reijnen et al., 2010	Plexauridae			GU363430
Cymbovula acicularis	RMNH-Mol-100815	Curaçao, Carcasbaii; CUR.17, 12°04’25.8”N, 12°04’25.8”N, 17 m	47	Reijnen et al., 2010	Gorgonidae			GU363437
Cyphoma signatum	RMNH-5004215	Sint Eustatius, Shark Reef	52	B. T. Reijnen, unpublished				KX360204
Cyphoma gibbosum	RMNH-Mol-100784	Curaçao, sint michielsbaai	47	B. T. Reijnen, unpublished				KX360207	KX360190
Cimbovula acicularis	RMNH-Mol-100792	Curaçao, Daaibooi; CUR.19,	47	B. T. Reijnen, unpublished					KT372474
Cyphoma gibbosum	RMNH-Mol-100798	Curaçao	47	B. T. Reijnen, unpublished				KX360203
Cymbovula acicularis	RMNH-Mol-337797	Caribbean	54	B. T. Reijnen, unpublished	Gorgonidae			KX360219	KX360201
Cymbovula acicularis	RMNH-Mol-337798	Caribbean	54	B. T. Reijnen, unpublished	Gorgonidae			KX360215	KX360198
Cyphoma gibbosum	RMNH-Mol-337803	Caribbean	54	B. T. Reijnen, unpublished				KX360208	KX360191
Cymbovula acicularis	RMNH-5004206	Sint Eustatius, The blocks; EUX015, 17°27’50.9”N, 17°27’50.9”N	52	Reijnen 2016			KX360175	KX360216	KX360199
Cymbovula acicularis	RMNH-5004207	Sint Eustatius, The blocks; EUX015, 17°27’50.9”N, 17°27’50.9”N	52	Reijnen 2016	Gorgonidae		KX360176	KX360217	KX360200
Cymbovula acicularis	RMNH-5004208	Sint Eustatius, Blind Shoal; EUX039, 17°30’37.1”N, 17°30’37.1”N	52	Reijnen 2016	Gorgonidae		KX360177	KX360218	KX360202
Cyphoma gibbosum	RMNH-5004209	Sint Eustatius, Aquarium; EUX012, 17°30’22.6”N, 17°30’22.6”N	52	Reijnen 2016			KX360170	KX360209	KX360192
Cyphoma gibbosum	RMNH-5004210	Sint Eustatius, Aquarium; EUX012, 17°30’22.6”N, 17°30’22.6”N	52	Reijnen 2016	Plexaurellidae			KX360211	KX360194
Cyphoma gibbosum	RMNH-5004211	Sint Eustatius, Blairs reef; EUX019, 17°28’13.6”N, 17°28’13.6”N	52	Reijnen 2016	Gorgonidae		KX360172	KX360213	KX360196
Cyphoma gibbosum	RMNH-5004212	Sint Eustatius, Twelve guns; EUX029, 17°28’12.8”N, 17°28’12.8”N	52	Reijnen 2016				KX360206
Cyphoma gibbosum	RMNH-5004213	Sint Eustatius, Blue Bead hole II; EUX037, 17°28’37.4”N, 17°28’37.4”N	52	Reijnen 2016			KX360171	KX360212	KX360195
Cyphoma signatum	RMNH-5004214	Sint Eustatius, Aquarium; EUX012, 17°30’22.6”N, 17°30’22.6”N	52	Reijnen 2016			KX360173	KX360214	KX360197
Cyphoma signatum	RMNH-5004216	Sint Eustatius, Blairs reef; EUX019, 17°28’13.6”N, 17°28’13.6”N	52	Reijnen 2016				KX360210	KX360193
Cyphoma signatum	RMNH-5004217	Sint Eustatius, Shark reef; EUX018, 17°30’37.1”N, 17°30’37.1”N	52	Reijnen 2016			KX360169	KX360205
Simnia avena	K116m	Mexico, Cabo Corrientes; 12 m	41	Sánchez et al., 2016	Gorgoniidae	Leptogorgia	KU557449	KU557466
Simnia sp.	K136m	Mexico, Cabo Corrientes; 15 m	41	Sánchez et al., 2016	Gorgoniidae	Pacifigorgia	KU557450
Simnia avena	K168m	Mexico, Cabo Corrientes; 5 m	41	Sánchez et al., 2016	Gorgoniidae	Pacifigorgia	KU557451	KU557468
Simnia avena	K175m	Mexico, Cabo Corrientes; 15 m	41	Sánchez et al., 2016	Gorgoniidae	Pacifigorgia	KU557452	KU557469
Simnia avena	K191m	Mexico, Cabo Corrientes; 10 m	41	Sánchez et al., 2016	Gorgoniidae	Pacifigorgia	KU557453	KU557470
Simnia avena	K193m	Mexico, Cabo Corrientes; 12 m	41	Sánchez et al., 2016	Gorgoniidae	Pacifigorgia	KU557454	KU557471
Simnia avena	K237m	Mexico, Cabo Corrientes; 15 m	41	Sánchez et al., 2016	Gorgoniidae	Pacifigorgia	KU557455	KU557472
Simnialena rufa	Y098m	Colombia, Malpelo Island; 10 m	53	Sánchez et al., 2016	Gorgoniidae	Pacifigorgia	KU557456	KU557473
Simnialena rufa*	Y100m	Colombia, Malpelo Island; 10 m	53	Sánchez et al., 2016	Gorgoniidae	Pacifigorgia	KU557457	KU557474
Simnialena rufa	Y101m	Colombia, Malpelo Island; 10 m	53	Sánchez et al., 2016	Gorgoniidae	Pacifigorgia	KU557458	KU557475
Simnialena rufa	Y109m	Colombia, Malpelo Island; 15 m	53	Sánchez et al., 2016	Gorgoniidae	Pacifigorgia	KU557459	KU557476
Simnia avena	Y183m	Mexico, Cabo Corrientes; 12 m	41	Sánchez et al., 2016	Gorgoniidae	Pacifigorgia	KU557460	KU557477
Simnia sp.	Y185m	Mexico, Cabo Corrientes; 12 m	41	Sánchez et al., 2016	Gorgoniidae	Pacifigorgia	KU557461	KU557478
Simnia avena	Y188m	Mexico, Cabo Corrientes; 10 m	41	Sánchez et al., 2016	Gorgoniidae	Eugorgia	KU557462	KU557479
Simnia avena	Y197m	Mexico, Cabo Corrientes; 12 m	41	Sánchez et al., 2016	Gorgoniidae	Pacifigorgia	KU557463	KU557480
Simnia avena*	Y198m	Mexico, Cabo Corrientes; 12 m	41	Sánchez et al., 2016	Gorgoniidae	Leptogorgia	KU557464	KU557481
Simnia sp.	Y199m	Mexico, Cabo Corrientes; 12 m	41	Sánchez et al., 2016	Gorgoniidae	Pacifigorgia	KU557465	KU557482
Pedicularia pacifica		Indonesia, Sulawesi	37	Schiaparelli et al., 2005				AJ868545
Dentiovula colobica		Indonesia, Sulawesi	37	Schiaparelli et al., 2005				AJ868546
Procalpurnus lacteus		Indonesia, Sulawesi	37	Schiaparelli et al., 2005	Alcyoniidae	Sinularia		AJ868547
Prosimnia semperi		Indonesia, Sulawesi	37	Schiaparelli et al., 2005	Melithaeidae	Melithaea		AJ868548
Amonovula piriei		Filippine, Cebu, Olango Island	39	Schiaparelli et al., 2005				AJ868551
Simnia spelta pop variant b		Mediterranean Sea		Schiaparelli et al., 2005	Gorgoniidae	Leptogorgia		AJ868556
Simnia spelta pop variant a		Mediterranean Sea		Schiaparelli et al., 2005	Gorgoniidae	Eunicella		AJ868557
Habuprionovolva aenigma pop variant b		Indonesia, Sulawesi	37	Schiaparelli et al., 2005				AJ868559
Habuprionovolva aenigma pop variant a		Indonesia, Sulawesi	37	Schiaparelli et al., 2005				AJ868560
Dentiovula dorsuosa pop variant a		Indonesia, Sulawesi	37	Schiaparelli et al., 2005				AJ868561
Dentiovula dorsuosa pop variant b		Indonesia, Sulawesi	37	Schiaparelli et al., 2005				AJ868562
Dentiovula dorsuosa pop variant c		Indonesia, Sulawesi	37	Schiaparelli et al., 2005				AJ868563
Phenacovolva lahainaensis		Indonesia, Sulawesi	37	Schiaparelli et al., 2005	Antipathidae	Antipathella		AJ868565
Sandalia triticea*		Cina, Zhejiang	44	Wu et al., 2022			MG450349
Aclyvolva lanceolata	Ov-CB-1057	Vietnam, Cat Ba; CB6, 20°47.313’N, 107°06.551’E, 0-35 m	28	Zvonareva et al., 2020	Ellisellidae	Dichotella	MT457239	MT477004	MT452925
Phenacovolva rosea	Ov-CB-1065	Vietnam, Cat Ba; CB6, 20°47.313’N, 107°06.551’E, 0-35 m	28	Zvonareva et al., 2020	Paramuriceidae	Paraplexaura			MT452923
Crenavolva traillii	Ov-CB-1067	Vietnam, Cat Ba; CB6, 20°47.313’N, 107°06.551’E, 0-35 m	28	Zvonareva et al., 2020	Paramuriceidae	Paraplexaura	MT457218		MT452959
Phenacovolva rosea	Ov-CB-1069	Vietnam, Cat Ba; CB5, 20°43.840’N, 07°0526’E, 0-35 m	28	Zvonareva et al., 2020	Anthogorgiidae	Anthogorgia	MT457250		MT452910
Phenacovolva rosea	Ov-CB-1070	Vietnam, Cat Ba; CB5, 20°43.840’N, 107°0526’E, 0-35 m	28	Zvonareva et al., 2020	Astrogorgiidae	Astrogorgia	MT457251		MT452911
Phenacovolva rosea	Ov-CB-1071	Vietnam, Cat Ba; CB5, 20°43.840’N, 107°0526’E, 0-35 m	28	Zvonareva et al., 2020	Astrogorgiidae	Astrogorgia	MT457252	MT477005	MT452912
Phenacovolva rosea	Ov-CB-1072	Vietnam, Cat Ba; CB5, 20°43.840’N, 107°0526’E, 0-35 m	28	Zvonareva et al., 2020	Astrogorgiidae	Astrogorgia	MT457253		MT457253
Crenavolva traillii	Ov-CB-1073	Vietnam, Cat Ba; CB6, 20°47.313’N, 107°06.551’E, 0-35 m	28	Zvonareva et al., 2020	Paramuriceidae	Paraplexaura	MT457221		MT452962
Crenavolva traillii	Ov-CB-1074	Vietnam, Cat Ba; CB6, 20°47.313’N, 107°06.551’E, 0-35 m	28	Zvonareva et al., 2020	Paramuriceidae	Paraplexaura	MT457222	MT477006	MT452963
Crenavolva traillii	Ov-CB-1075	Vietnam, Cat Ba; CB6, 20°47.313’N, 107°06.551’E, 0-35 m	28	Zvonareva et al., 2020	Paramuriceidae	Paraplexaura	MT457223		MT452964
Crenavolva traillii	Ov-CB-1076	Vietnam, Cat Ba; CB6, 20°47.313’N, 107°06.551’E, 0-35 m	28	Zvonareva et al., 2020	Plexauridae	Trimuricea	MT457224		MT452965
Crenavolva traillii	Ov-CB-1078	Vietnam, Cat Ba; CB6, 20°47.313’N, 107°06.551’E, 0-35 m	28	Zvonareva et al., 2020	Plexauridae	Trimuricea	MT457225	MT477007	MT452966
Crenavolva traillii	Ov-CB-1079	Vietnam, Cat Ba; CB6, 20°47.313’N, 107°06.551’E, 0-35 m	28	Zvonareva et al., 2020	Plexauridae	Trimuricea	MT457226		MT452967
Cuspivolva cuspis	Ov-CB-1081	Vietnam, Cat Ba; CB4, 20°43.855’N, 107°04.879’E, 0-35 m	28	Zvonareva et al., 2020	Plexauridae	Euplexaura	MT457257	MT477008	MT452979
Aclyvolva lanceolata	Ov-CB-1083	Vietnam, Cat Ba; CB4, 20°43.855’N, 107°04.879’E, 0-35 m	28	Zvonareva et al., 2020	Ellissellidae	Verrucella		MT477009	MT452930
Crenavolva striatula*	Ov-CB-1084	Vietnam, Cat Ba; CB4, 20°43.855’N, 107°04.879’E, 0-35 m	28	Zvonareva et al., 2020	Paramuriceidae	Echinogorgia	MT457254	MT477010	MT452969
Crenavolva striatula	Ov-CB-1087	Vietnam, Cat Ba; CB4, 20°43.855’N, 107°04.879’E, 0-35 m	28	Zvonareva et al., 2020	Paramuriceidae	Echinogorgia	MT457255		MT452968
Cuspivolva cuspis	Ov-CB-1088	Vietnam, Cat Ba; CB4, 20°43.855’N, 107°04.879’E, 0-35 m	28	Zvonareva et al., 2020	Plexauridae	Euplexaura	MT457258	MT477011	MT452978
Aclyvolva lanceolata	Ov-CB-1089	Vietnam, Cat Ba; CB4, 20°43.855’N, 107°04.879’E, 0-35 m	28	Zvonareva et al., 2020	Ellisellidae	Junceella		MT477012	MT452931
Aclyvolva lanceolata	Ov-CB-1090	Vietnam, Cat Ba; CB4, 20°43.855’N, 107°04.879’E, 0-35 m	28	Zvonareva et al., 2020	Ellisellidae	Junceella		MT477013	MT452932
Crenavolva traillii	Ov-CB-1091	Vietnam, Cat Ba; CB4, 20°43.855’N, 107°04.879’E, 0-35 m	28	Zvonareva et al., 2020	Paramuriceidae	Menella			MT452958
Phenacovolva rosea	Ov-CB-1092	Vietnam, Cat Ba; CB4, 20°43.855’N, 107°04.879’E, 0-35 m	28	Zvonareva et al., 2020	Anthogorgiidae	Anthogorgia	MT457259
Crenavolva striatula	Ov-CB-1094	Vietnam, Cat Ba; CB4, 20°43.855’N, 107°04.879’E, 0-35 m	28	Zvonareva et al., 2020	Paramuriceidae	Echinogorgia	MT457260	MT477014	MT452970
Cuspivolva cuspis	Ov-CB-1095	Vietnam, Cat Ba; CB4, 20°43.855’N, 107°04.879’E, 0-35 m	28	Zvonareva et al., 2020	Plexauridae	Euplexaura		MT477015	MT452980
Phenacovolva rosea	Ov-CB-1097	Vietnam, Cat Ba; CB4, 20°43.855’N, 107°04.879’E, 0-35 m	28	Zvonareva et al., 2020	Astrogorgiidae	Astrogorgia			MT452913
Phenacovolva rosea	Ov-CB-1098	Vietnam, Cat Ba; CB4, 20°43.855’N, 107°04.879’E, 0-35 m	28	Zvonareva et al., 2020	Astrogorgiidae	Astrogorgia	MT457261		MT452914
Phenacovolva rosea	Ov-CB-1099	Vietnam, Cat Ba; CB1, 20°44.514’N, 107°07.795’E, 0-35 m	28	Zvonareva et al., 2020	Ellisellidae	Dichotella			MT452915
Aclyvolva lanceolata	Ov-CB-1101	Vietnam, Cat Ba; CB1, 20°44.514’N, 107°07.795’E, 0-35 m	28	Zvonareva et al., 2020	Ellissellidae	Verrucella			MT452926
Aclyvolva lanceolata	Ov-CB-1102	Vietnam, Cat Ba; CB4, 20°43.855’N, 107°04.879’E, 0-35 m	28	Zvonareva et al., 2020	Ellissellidae	Junceella			MT452933
Phenacovolva rosea	Ov-CB-1103	Vietnam, Cat Ba; CB4, 20°43.855’N, 107°04.879’E, 0-35 m	28	Zvonareva et al., 2020	Ellisellidae	Junceella	MT457262		MT452916
Calpurnus verrucosus*	Ov-CB-1104	Vietnam, Cat Ba; TC4, 09°19.074’N, 103°32.070’E, 0-35 m	11	Zvonareva et al., 2020	Alcyoniidae	Sarcophython	MT449694	MT477016	MT452984
Prosimnia semperi	Ov-NT-1001	Vietnam, Nha Trang, Mot I.; NT1, 12°9.699’N, 109°18.849’E, 0-35 m	47	Zvonareva et al., 2020	Melithaeidae	Melithaea	MT457212	MT477017
Prosimnia semperi	Ov-NT-1002	Vietnam, Nha Trang, Mot I.; NT1, 12°9.699’N, 109°18.849’E, 0-35 m	47	Zvonareva et al., 2020	Melithaeidae	Melithaea	MT457213		MT452946
Prosimnia semperi	Ov-NT-1003	Vietnam, Nha Trang, Mot I.; NT1, 12°9.699’N, 109°18.849’E, 0-35 m	47	Zvonareva et al., 2020	Melithaeidae	Melithaea	MT457214
Dentiovula dorsuosa	Ov-NT-1004	Vietnam, Nha Trang, Mot I.; NT1, 12°9.699’N, 109°18.849’E, 0-35 m	47	Zvonareva et al., 2020	Siphonogorgiidae	Chironephthia	MT457215	MT477018	MT452942
Prosimnia semperi	Ov-NT-1005	Vietnam, Nha Trang, Mot I.; NT1, 12°9.699’N, 109°18.849’E, 0-35 m	47	Zvonareva et al., 2020	Melithaeidae	Melithaea	MT457216	MT477019	MT452947
Prosimnia semperi	Ov-NT-1008	Vietnam, Nha Trang, Mot I.; NT1, 12°9.699’N, 109°18.849’E, 0-35 m	47	Zvonareva et al., 2020	Melithaeidae	Melithaea	MT457231		MT452948
Habuprionovolva aenigma*	Ov-NT-1009	Vietnam, Nha Trang, Mot I.; NT1, 12°9.699’N, 109°18.849’E, 0-35 m	47	Zvonareva et al., 2020	Dendronephthiidae	Dendronephthya	MT457232	MT477020	MT452982
Habuprionovolva aenigma	Ov-NT-1010	Vietnam, Nha Trang, Mot I.; NT1, 12°9.699’N, 109°18.849’E, 0-35 m	47	Zvonareva et al., 2020	Dendronephthiidae	Dendronephthya	MT457233	MT477021	MT452983
Diminovula margarita	Ov-NT-1011	Vietnam, Nha Trang, Mot I.; NT3, 12°11.417’N, 109°20.478’E, 0-35 m	47	Zvonareva et al., 2020	Nephtheidae	Litophyton	MT457234	MT477022	MT452943
Diminovula margarita	Ov-NT-1012	Vietnam, Nha Trang, Mot I.; NT3, 12°11.417’N, 109°20.478’E, 0-35 m	47	Zvonareva et al., 2020	Nephtheidae	Litophyton	MT457235	MT477023	MT452944
Naviculovolva deflexa	Ov-NT-1013	Vietnam, Nha Trang, Mot I.; NT3, 12°11.417’N, 109°20.478’E, 0-35 m	47	Zvonareva et al., 2020	isididae	Rumphella	MT457236	MT477024	MT452953
Phenacovolva rosea	Ov-NT-1015	Vietnam, Nha Trang, Tre I.; NT5, 12°10.855’N, 109°17.739’E, 0-35 m	47	Zvonareva et al., 2020	Paramuriceidae	Paraplexaura	MT457237	MT477025	MT452922
Naviculovolva deflexa*	Ov-NT-1016	Vietnam, Nha Trang, Tre I.; NT5, 12°10.855’N, 109°17.739’E, 0-35 m	47	Zvonareva et al., 2020	isididae	Rumphella	MT457238	MT477026	MT452952
Naviculovolva deflexa	Ov-NT-1017	Vietnam, Nha Trang, Tre I.; NT5, 12°10.855’N, 109°17.739’E, 0-35 m	47	Zvonareva et al., 2020	isididae	Rumphella	MT457240	MT477027	MT452954
Prosimnia semperi	Ov-NT-1018	Vietnam, Nha Trang, Mot I.; NT6, 12°10.519’N, 109°16.718’E, 0-35 m	47	Zvonareva et al., 2020	Melithaeidae	Melithaea	MT457241		MT452945
Prosimnia semperi	Ov-NT-1022	Vietnam, Nha Trang, Mot I.; NT6, 12°10.519’N, 109°16.718’E, 0-35 m	47	Zvonareva et al., 2020	Melithaeidae	Melithaea	MT457242	MT477028	MT452949
Prosimnia semperi	Ov-NT-1029	Vietnam, Nha Trang, Mot I.; NT6, 12°10.519’N, 109°16.718’E, 0-35 m	47	Zvonareva et al., 2020	Melithaeidae	Melithaea	MT457243		MT452951
Ovula ovum*	Ov-NT-1032	Vietnam, Nha Trang, Tre I.; NT5, 12°10.855’N, 109°17.739’E, 0-35 m	47	Zvonareva et al., 2020	Sarcophytidae	Sarcophyton	MT457244	MT477029	MT452934
Prosimnia semperi	Ov-NT-1105	Vietnam, Nha Trang, Mun I.; NT6, 12°10.519’N, 109°16.718’E, 0-35 m	47	Zvonareva et al., 2020	Melithaeidae	Melithaea	MT457263		MT452950
Prosimnia semperi	Ov-NT-1106	Vietnam, Nha Trang, Mun I.; NT6, 12°10.519’N, 109°16.718’E, 0-35 m	47	Zvonareva et al., 2020	Melithaeidae	Melithaea	MT457264
Phenacovolva rosea	Ov-NT-1108	Vietnam, Nha Trang, Mun I.; NT6, 12°10.519’N, 109°16.718’E, 0-35 m	47	Zvonareva et al., 2020	Paramuriceidae	Paraplexaura	MT457265		MT452917
Phenacovolva rosea	Ov-NT-1109	Vietnam, Nha Trang, Mun I.; NT6, 12°10.519’N, 109°16.718’E, 0-35 m	47	Zvonareva et al., 2020	Paramuriceidae	Paraplexaura	MT457266		MT452918
Phenacovolva rosea	Ov-NT-1110	Vietnam, Nha Trang, Mun I.; NT6, 12°10.519’N, 109°16.718’E, 0-35 m	47	Zvonareva et al., 2020	Paramuriceidae	Paraplexaura	MT457267		MT452919
Phenacovolva rosea	Ov-NT-1111	Vietnam, Nha Trang, Mot I.; NT6, 12°10.519’N, 109°16.718’E, 0-35 m	47	Zvonareva et al., 2020	Paramuriceidae	Paraplexaura			MT452920
Phenacovolva rosea	Ov-NT-976	Vietnam, Nha Trang, Tre I.; NT5, 12°10.855’N, 109°17.739’E, 0-35 m	47	Zvonareva et al., 2020	Astrogorgiidae	Astrogorgia	MT457201	MT477032	MT452907
Phenacovolva rosea	Ov-NT-977	Vietnam, Nha Trang, Tre I.; NT5, 12°10.855’N, 109°17.739’E, 0-35 m	47	Zvonareva et al., 2020	Astrogorgiidae	Astrogorgia	MT457202	MT477033	MT452909
Amonovula pirei	Ov-NT-979	Vietnam, Nha Trang, Nok I.; NT3, 12°11.417’N, 109°20.478’E, 0-35 m	47	Zvonareva et al., 2020	Euplexauridae	Euplexaura	MT457203	MT477034	MT452936
Pellasimnia annabelae	Ov-NT-981	Vietnam, Nha Trang, Noi I.; NT4, 12°2.986’N, 109°19.577’E, 0-35 m	47	Zvonareva et al., 2020	Annellidae	Annella	MT457204	MT477035	MT452924
Prionovolva brevis*	Ov-NT-982	Vietnam, Nha Trang, Noi I.; NT4, 12°2.986’N, 109°19.577’E, 0-35 m	47	Zvonareva et al., 2020	Dendronephthiidae	Dendronephthya	MT457205	MT477036	MT452935
Habuprionovolva aenigma	Ov-NT-986	Vietnam, Nha Trang, Tre I.; NT5, 12°10.855’N, 109°17.739’E, 0-35 m	47	Zvonareva et al., 2020	Dendronephthiidae	Dendronephthya	MT457206	MT477037	MT452981
Crenavolva traillii	Ov-NT-988	Vietnam, Nha Trang, Mot I.; NT6, 12°10.519’N, 109°16.718’E, 0-35 m	47	Zvonareva et al., 2020	Paramuriceidae	Paraplexaura	MT457217	MT477038
Cuspivolva cuspis*	Ov-NT-989	Vietnam, Nha Trang, Nok I.; NT3, 12°11.417’N, 109°20.478’E, 0-35 m	47	Zvonareva et al., 2020	Plexauridae	Euplexaura	MT457256	MT477039	MT452977
Rotaovula septimaculata	Ov-NT-990	Vietnam, Nha Trang, Dung I.; NT2, 12°2.986’N, 109°19.577’E, 0-35 m	47	Zvonareva et al., 2020	Paramuriceidae	Bebryce	MT457207		MT452938
Rotaovula septimaculata	Ov-NT-992	Vietnam, Nha Trang, Noi I.; NT4, 12°2.986’N, 109°19.577’E, 0-35 m	47	Zvonareva et al., 2020	Paramuriceidae	Bebryce	MT457208	MT477040	MT452939
Rotaovula septimaculata*	Ov-NT-993	Vietnam, Nha Trang, Noi I.; NT4, 12°2.986’N, 109°19.577’E, 0-35 m	47	Zvonareva et al., 2020	Paramuriceidae	Bebryce	MT457209	MT477041	MT452940
Rotaovula septimaculata	Ov-NT-994	Vietnam, Nha Trang, Nok I.; NT3, 12°11.417’N, 109°20.478’E, 0-35 m	47	Zvonareva et al., 2020	Paramuriceidae	Bebryce	MT457210	MT477042	MT452941
Rotaovula septimaculata	Ov-NT-999	Vietnam, Nha Trang, Tre I.; NT5, 12°11.417’N, 109°17.739’E, 0-35 m	47	Zvonareva et al., 2020	Paramuriceidae	Bebryce	MT457211	MT477043	MT452937
Aclyvolva lanceolata	Ov-PQ-1033	Vietnam, Phu Quoc; PQ7, 09°54.911’N, 104°00.089’E, 0-35 m	8	Zvonareva et al., 2020	Ellissellidae	Verrucella		MT477044	MT452927
Aclyvolva lanceolata	Ov-PQ-1037	Vietnam, Phu Quoc; PQ6, 09°54.881’N, 103°59.421’E, 0-35 m	8	Zvonareva et al., 2020	Ellissellidae	Verrucella		MT477045	MT452928
Cuspivolva queenslandica	Ov-PQ-1038	Vietnam, Phu Quoc; PQ7, 09°54.911’N, 104°00.089’E, 0-35 m	8	Zvonareva et al., 2020	Gorgoniidae	Pseudopterogorgia	MT457245	MT477046	MT452971
Cuspivolva queenslandica*	Ov-PQ-1040	Vietnam, Phu Quoc; PQ4, 09°58.433’N, 104°01.017’E, 0-35 m	8	Zvonareva et al., 2020	Gorgoniidae	Pseudopterogorgia	MT457246	MT477047	MT452972
Aclyvolva lanceolata	Ov-PQ-1041	Vietnam, Phu Quoc; PQ4, 09°58.433’N, 104°01.017’E, 0-35 m	8	Zvonareva et al., 2020	Ellisellidae	Dichotella			MT452929
Cuspivolva queenslandica	Ov-PQ-1042	Vietnam, Phu Quoc; PQ4, 09°58.433’N, 104°01.017’E, 0-35 m	8	Zvonareva et al., 2020	Gorgoniidae	Pseudopterogorgia	MT457247	MT477048	MT452973
Cuspivolva queenslandica	Ov-PQ-1044	Vietnam, Phu Quoc; PQ4, 09°58.433’N, 104°01.017’E, 0-35 m	8	Zvonareva et al., 2020	Gorgoniidae	Pseudopterogorgia			MT452974
Crenavolva traillii	Ov-PQ-1046	Vietnam, Phu Quoc; PQ4, 09°58.433’N, 104°01.017’E, 0-35 m	8	Zvonareva et al., 2020	Subergorgidae	Subergorgia	MT457219	MT477049	MT452960
Crenavolva traillii	Ov-PQ-1047	Vietnam, Phu Quoc; PQ4, 09°58.433’N, 104°01.017’E, 0-35 m	8	Zvonareva et al., 2020	Subergorgidae	Subergorgia	MT457220		MT452961
Cuspivolva queenslandica	Ov-PQ-1048	Vietnam, Phu Quoc; PQ5, 09°55.827’N, 103°59.544’E, 0-35 m	8	Zvonareva et al., 2020	Gorgoniidae	Pseudopterogorgia			MT452975
Cuspivolva queenslandica	Ov-PQ-1049	Vietnam, Phu Quoc; PQ5, 09°55.827’N, 103°59.544’E, 0-35 m	8	Zvonareva et al., 2020	Gorgoniidae	Pseudopterogorgia			MT452976
Phenacovolva rosea	Ov-PQ-1050	Vietnam, Phu Quoc; PQ5, 09°55.827’N, 103°59.544’E, 0-35 m	8	Zvonareva et al., 2020	Ellisellidae	Dichotella	MT457248	MT477050	MT452908
Crenavolva traillii	Ov-PQ-1051	Vietnam, Phu Quoc; PQ5, 09°55.827’N, 103°59.544’E, 0-35 m	8	Zvonareva et al., 2020	Paramuriceidae	Menella	MT457227	MT477051	MT452955
Crenavolva traillii	Ov-PQ-1052	Vietnam, Phu Quoc; PQ5, 09°55.827’N, 103°59.544’E, 0-35 m	8	Zvonareva et al., 2020	Paramuriceidae	Menella	MT457228	MT477052	MT452956
Crenavolva traillii	Ov-PQ-1053	Vietnam, Phu Quoc; PQ5, 09°55.827’N, 103°59.544’E, 0-35 m	8	Zvonareva et al., 2020	Paramuriceidae	Menella	MT457229	MT477053	MT452957
Phenacovolva rosea	Ov-SP-967	Vietnam, Len Dao I.; SP2, 09°46.89'N, 114°22.419'E, 0-35 m	8	Zvonareva et al., 2020	Isididae	Isis	MT457199	MT477030	MT452905
Phenacovolva rosea	Ov-SP-968	Vietnam, Da Lat I.; SP1, 08°39.528’N, 111°38.777’E, 0-35 m	11	Zvonareva et al., 2020	Isididae	Isis	MT457200	MT477031	MT452906
Aclyvolva coarctata	Ov-TC-1054	Vietnam, Tho Chu; TC9, 09°17.850’N, 103°27.050’E, 0-35 m	11	Zvonareva et al., 2020	Ellisellidae	Ctenocella			MT477054
Aclyvolva coarctata	Ov-TC-1055	Vietnam, Tho Chu; TC12, 09°16.700’N, 103°29.017’E, 0-35 m	11	Zvonareva et al., 2020	Ellisellidae	Ctenocella	MT457249	MT477055	MT452986
Outgroup
Tonna galea*	MNHN-IM-2013-56653	French Guiana		Strong et al., 2018			MH581378.1	MH571400	MH571230
Surrepifungium cotulatum*				Strong et al., 2018/Churchill et al., 2011			MH581374	MH571396	JF750962
Alvania angioyi*		Portugal, Baixa da Pedrinha		Baptista et al., 2017			MG652378.1	MG663126	MG663174
Trivia arctica*	BAU-2406-1	France, Ploubazlanec		Fassio et al., 2018			MK047785.1	MK047992	MK047972
Lamellaria latens*	BAU-2536-1	France, Pors-Even harbour		Fassio et al., 2018			MK047764.1	MK047989	MK047971
Littorina littorea*	MCZ-DNA101389			Giribet et al., 2006			DQ093525	DQ093481	DQ093459
