# Supplementary material for: Spicy food for the egg-cowries: the evolution of corallivory in the Ovulidae (Gastropoda: Cypraeoidea)
Source: Frontiers journal article supplement (doi:10.3389/fmars.2023.1323156), 2024-01-22
Supplement: Table_2.XLSX [file Table_2.XLSX]

## Sheet: Foglio4
Cnidarian voucher	Family	Ovulid associated voucher	16S	ITS2	MSH
BAU-4542.C	Astrogorgiidae	BAU-4542	OR671346
BAU-4543.C	Stylasteridae	BAU-4543	OR671347
BAU-4547.C	Stylasteridae	BAU-4547	OR671348
BAU-4548.C	Astrogorgiidae	BAU-4548	OR671349
MNHN-IK-2019-2703	Ellisellidae	MNHN-IM-2013-11745	OR671350
MNHN-IK-2019-2704	Astrogorgiidae	MNHN-IM-2013-11746	OR671351
MNHN-IK-2019-2705	Alcyoniidae	MNHN-IM-2013-13966	OR671352
MNHN-IK-2019-2706	Nephtheidae	MNHN-IM-2013-15219	OR671353
MNHN-IK-2019-2707	Nephtheidae	MNHN-IM-2013-17977	OR671354
MNHN-IK-2019-2708	Ellisellidae	MNHN-IM-2013-18075	OR671355
MNHN-IK-2019-2709	Melithaea	MNHN-IM-2013-4178	OR671356
MNHN-IK-2019-2710	Sinulariidae	MNHN-IM-2013-4426	OR671357
MNHN-IK-2019-2711	Melithaea	MNHN-IM-2013-4430	OR671358
MNHN-IK-2019-2712	Siphonogorgiidae	MNHN-IM-2013-4461	OR671359
MNHN-IK-2019-2713	Stylasteridae	MNHN-IM-2013-4463	OR671360
MNHN-IK-2019-2714	Ellisellidae	MNHN-IM-2013-47410	OR671361
MNHN-IK-2019-2715	Stylasteridae	MNHN-IM-2013-49464	OR671362
MNHN-IK-2019-2716	Ellisellidae	MNHN-IM-2013-51138	OR671363
MNHN-IK-2019-2717	Plexauridae	MNHN-IM-2013-51140	OR671364
MNHN-IK-2019-2718	Ellisellidae	MNHN-IM-2013-51141	OR671365
MNHN-IK-2019-2719	Melithaea	MNHN-IM-2013-51404	OR671366
MNHN-IK-2019-2720	Melithaeidae	MNHN-IM-2013-51443	OR671367
MNHN-IK-2019-2721	Antipathidae	MNHN-IM-2013-51707		OR644655
MNHN-IK-2019-2722	Nephtheidae	MNHN-IM-2013-51980	OR671368
MNHN-IK-2019-2723	Plexauridae	MNHN-IM-2013-5317	OR671369
MNHN-IK-2019-2724	Stylasteridae	MNHN-IM-2013-53606	OR671370
MNHN-IK-2019-2725	Stylasteridae	MNHN-IM-2013-53608	OR671371
MNHN-IK-2019-2726	Stylasteridae	MNHN-IM-2013-53609	OR671372
MNHN-IK-2019-2727	Plexauridae	MNHN-IM-2013-53904	OR671373
MNHN-IK-2019-2728	Stylasteridae	MNHN-IM-2013-53915	OR671374
MNHN-IK-2019-2729	Astrogorgiidae	MNHN-IM-2013-53963	OR671375
MNHN-IK-2019-2730	Plexauridae	MNHN-IM-2013-53964	OR671376
MNHN-IK-2019-2731	Plexauridae	MNHN-IM-2013-53965	OR671377
MNHN-IK-2019-2732	Subergorgiidae	MNHN-IM-2013-54003	OR671378
MNHN-IK-2019-2733	Plexauridae	MNHN-IM-2013-54265	OR671379
MNHN-IK-2019-2734	Plexauridae	MNHN-IM-2013-54266	OR671380
MNHN-IK-2019-2735	Ellisellidae	MNHN-IM-2013-54312	OR671381
MNHN-IK-2019-2736	Ellisellidae	MNHN-IM-2013-54313	OR671382
MNHN-IK-2019-2737	Stylasteridae	MNHN-IM-2013-55123	OR671383
MNHN-IK-2019-2738	Nephtheidae	MNHN-IM-2013-55743	OR671384
MNHN-IK-2019-2739	Gorgoniidae	MNHN-IM-2013-56966	OR671385
MNHN-IK-2019-2740	Gorgoniidae	MNHN-IM-2013-57291	OR671386
MNHN-IK-2019-2741	Gorgoniidae	MNHN-IM-2013-57299	OR671387
MNHN-IK-2019-2742	Gorgoniidae	MNHN-IM-2013-5878	OR671388
MNHN-IK-2019-2743	Stylasteridae	MNHN-IM-2013-5905	OR671389
MNHN-IK-2019-2744	Stylasteridae	MNHN-IM-2013-65607	OR671390
MNHN-IK-2019-2745	Gorgoniidae	MNHN-IM-2013-85207	OR671391
MNHN-IK-2019-2746	Stylasteridae	MNHN-IM-2013-9609		OR644656
MNHN-IK-2019-2747	Stylasteridae	MNHN-IM-2013-9610	OR671392
MNHN-IK-2019-2748	Eunicellidae	MNHN-IM-2019-16493	OR671393
MNHN-IK-2019-2749	Siphonogorgiidae	MNHN-IM-2019-18294	OR671394
MNHN-IK-2019-2750	Paramuriceidae	MNHN-IM-2019-18295		OR644657
MNHN-IK-2019-2751	Stylasteridae	MNHN-IM-2019-22806	OR671395
MNHN-IK-2019-2752	Eunicellidae	MNHN-IM-2019-5188		OR644658
MNHN-IK-2019-2753	Isididae	MNHN-IM-2019-8310	OR671396
Ov_CT_1486.C	Nephtheidae	Ov_CT_1486			OR652058
Ov_NT_1687.C	Paramuriceidae	Ov_NT_1687			OR652059
